# Supplementary material for: Towards the total synthesis of keramaphidin B
Source: publisher site journal article supplement (doi:10.3762/bjoc.12.104), 2016-05-30
Supplement: Additional file 1 [file 1860-5397-12-104-S1.pdf]

# Supporting Information

for

## Towards the total synthesis of keramaphidin B

Pavol Jakubec<sup>1</sup>, Alistair J. M. Farley<sup>1</sup> and Darren J. Dixon\*<sup>1</sup>

Address: <sup>1</sup>Department of Chemistry, Chemistry Research Laboratory, University of Oxford,  
12 Mansfield Road, Oxford, OX1 3TA, United Kingdom

Email: Darren J. Dixon - darren.dixon@chem.ox.ac.uk

\* Corresponding author

### Experimental procedures, analytical data, copies of NMR spectra and single X-ray crystal diffraction data of **14**

|          |                                                                                           |           |
|----------|-------------------------------------------------------------------------------------------|-----------|
| <b>1</b> | <b>General experimental .....</b>                                                         | <b>S3</b> |
| 1.1      | Solvents and reagents .....                                                               | S3        |
| 1.2      | Chromatography .....                                                                      | S3        |
| 1.3      | Instrumentation .....                                                                     | S3        |
| 1.4      | Starting materials .....                                                                  | S4        |
| <b>2</b> | <b>Practical experimental.....</b>                                                        | <b>S5</b> |
| 2.1      | Synthesis and characterization of <b>8</b> .....                                          | S5        |
| 2.2      | Synthesis and characterization of <b>13</b> and <b>14</b> .....                           | S6        |
| 2.3      | Synthesis and characterization of <i>rac</i> - <b>13</b> and <i>rac</i> - <b>14</b> ..... | S7        |
| 2.4      | Synthesis and characterisation of <b>15</b> .....                                         | S8        |
| 2.5      | Synthesis and characterisation of <b>7</b> and <b>7'</b> .....                            | S9        |
| 2.6      | Synthesis and characterisation of <b>6</b> .....                                          | S10       |
| 2.7      | Synthesis of <i>rac</i> - <b>6</b> .....                                                  | S11       |
| 2.8      | Synthesis and characterization of <b>17</b> .....                                         | S12       |
| 2.9      | Synthesis and characterisation of <b>18</b> .....                                         | S13       |
| 2.10     | Synthesis and characterisation of <b>20</b> .....                                         | S14       |
|          |                                                                                           | S1        |

|          |                                                                   |            |
|----------|-------------------------------------------------------------------|------------|
| 2.11     | Synthesis and characterisation of <b>21</b> .....                 | S15        |
| 2.12     | Synthesis and characterisation of <b>5</b> .....                  | S16        |
| <b>3</b> | <b>Single X-ray Crystal Diffraction Data of 14</b> .....          | <b>S17</b> |
| <b>4</b> | <b>References</b> .....                                           | <b>S22</b> |
| <b>5</b> | <b>Supplementary Data</b> .....                                   | <b>S23</b> |
| 5.1      | <sup>1</sup> H and <sup>13</sup> C NMR spectra of <b>8</b> .....  | S23        |
| 5.2      | <sup>1</sup> H and <sup>13</sup> C NMR spectra of <b>13</b> ..... | S24        |
| 5.3      | <sup>1</sup> H and <sup>13</sup> C NMR spectra of <b>14</b> ..... | S25        |
| 5.4      | <sup>1</sup> H and <sup>13</sup> C NMR spectra of <b>15</b> ..... | S26        |
| 5.5      | <sup>1</sup> H and <sup>13</sup> C NMR spectra of <b>7</b> .....  | S27        |
| 5.6      | <sup>1</sup> H and <sup>13</sup> C NMR spectra of <b>6</b> .....  | S28        |
| 5.7      | <sup>1</sup> H and <sup>13</sup> C NMR spectra of <b>17</b> ..... | S29        |
| 5.8      | <sup>1</sup> H and <sup>13</sup> C NMR spectra of <b>18</b> ..... | S30        |
| 5.9      | <sup>1</sup> H and <sup>13</sup> C NMR spectra of <b>20</b> ..... | S31        |
| 5.10     | <sup>1</sup> H and <sup>13</sup> C NMR spectra of <b>21</b> ..... | S32        |
| 5.11     | <sup>1</sup> H and <sup>13</sup> C NMR spectra of <b>5</b> .....  | S33        |
| 5.12     | HPLC chromatogram of <b>13</b> .....                              | S34        |
| 5.13     | HPLC chromatogram of <b>6</b> .....                               | S35        |

## 1 General experimental

### 1.1 Solvents and reagents

Concentration under reduced pressure was performed by rotary evaporation at the appropriate pressure and temperature. Reagents used were obtained from commercial suppliers or purified according to standard procedures. Petroleum ether refers to distilled light petroleum of fraction 30–40 °C. Anhydrous toluene, tetrahydrofuran, dichloromethane and diethyl ether were dried by filtration through activated alumina (powder ~150 mesh, pore size 58 Å, basic, Sigma-Aldrich) columns. Dimethyl sulfoxide and dimethylformamide were used as supplied. Deuterated solvents were used as supplied.

### 1.2 Chromatography

Reactions were monitored by thin-layer chromatography (TLC) using Merck silica gel 60 F<sub>254</sub> plates and visualized by fluorescence quenching under UV light. In addition, TLC plates were stained with potassium permanganate solution. Flash column chromatography (FCC) was performed on VWR 60 silica gel 40–63 µm using technical grade solvents that were used as supplied.

### 1.3 Instrumentation

Melting points were obtained on a Leica Galen III Hot-stage melting point apparatus and microscope and on a Kofler hot block and are reported uncorrected. All <sup>1</sup>H and <sup>13</sup>C NMR spectra were recorded using a Bruker 500 MHz and Bruker 400 MHz spectrometers and are quoted in ppm for measurement against a residual solvent peaks as internal standards. Chemical shifts (δ) are given in parts per million (ppm) and coupling constants (*J*) are given in Hertz (Hz). The <sup>1</sup>H NMR spectra are reported as follows: δ [multiplicity (s = singlet, d = doublet, t = triplet, q = quartet, quin = quintet, m = multiplet, "t" = apparent triplet, "d" = apparent doublet, "q" = apparent quartet, br. s = broad singlet, br. d = broad doublet, sxt = sextet), number of protons, coupling constants *J*/Hz (where appropriate) and assignment (where appropriate)]. DEPT 135 and two-dimensional (COSY, HSQC, HMBC) NMR spectroscopy were used where appropriate to assist the assignment of signals in the <sup>1</sup>H and <sup>13</sup>C NMR spectra. Low resolution mass spectra were recorded on a Waters LCT premier XE Micromass spectrometer (ESI). High-resolution mass spectra were recorded on a Bruker

MicroTof mass spectrometer (ESI). Infrared spectra were recorded on a Bruker Tensor 27 FT-IR spectrometer as a thin film. Only selected maximum absorbances are reported. Optical rotations were recorded using a Perkin Elmer 341 polarimeter;  $[\alpha]_D^T$  values are reported in  $10^{-1} \text{ deg cm}^2 \text{ g}^{-1}$ ; concentrations ( $c$ ) are quoted in g/100 mL; D refers to the D-line of sodium (589 nm); temperatures ( $T$ ) are given in degrees Celsius ( $^{\circ}\text{C}$ ). (+) and (−) compound number prefixes indicate the sign of the optical rotation. The enantiomeric excesses were determined by HPLC analysis on an Agilent 1200 Series instrument employing a chiral stationary phase column specified in the individual experiment and by comparing the samples with the appropriate racemic mixtures.

Compound names are those generated by ACD LABS 12.0 following IUPAC nomenclature.

## 1.4 Starting materials

Catalyst **12**,<sup>1,2</sup> amine **16**,<sup>3</sup> Petasis reagent<sup>4</sup> and nitroolefins **9**<sup>5</sup> and **11**<sup>5</sup> were prepared according to the literature procedures. The following compounds are commercially available:  $\delta$ -valerolactone (**10**) and hex-5-en-1-amine (**19**).

## 2 Practical experimental

### 2.1 Synthesis and characterization of 8

*rac*-Methyl 2-oxotetrahydro-2*H*-pyran-3-carboxylate (**8**)

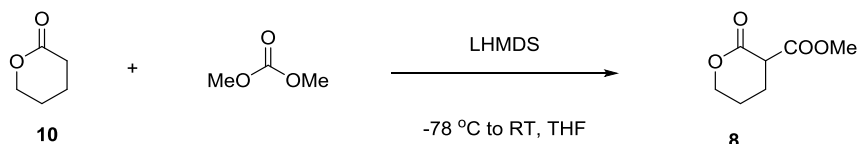

A mixture of  $\delta$ -valerolactone (**10**, 0.0100 mol, 1.00 g) and dimethyl carbonate (0.011 mol, 0.95 g, 0.88 mL) was added dropwise to a solution of LHMDS in THF (0.0205 mol, 20.5 mL of 1.0 M solution in THF) at  $-78\text{ }^{\circ}\text{C}$ . The resulting mixture was warmed to rt and stirred at rt. After 4 h the reaction mixture was quenched by the dropwise addition of AcOH (glacial, 1.4 mL) and diluted with  $\text{Et}_2\text{O}$  (60 mL). The resulting suspension was vigorously stirred at rt for 5 min. The insoluble solid was filtered off, washed ( $\text{Et}_2\text{O}$ ,  $2 \times 20\text{ mL}$ ) and the filtrate was concentrated in vacuo. The residue was purified by purified by column chromatography (PE: $\text{Et}_2\text{O}$  2:1  $\rightarrow$  1:1) affording **8** (1.32 g, 83%) as a pale-yellow liquid.

**IR** (film) 2957 (C-H), 1721 (C=O), 1151 (C-O);  **$^1\text{H}$ -NMR** (400 MHz,  $\text{CDCl}_3$ )  $\delta$  1.80 - 1.99 (m, 2H), 2.09 - 2.26 (m, 2H), 3.53 (t, 1H,  $J = 8.0\text{ Hz}$ ), 3.73 (s, 3H), 4.20 - 4.35 (m, 2H);  **$^{13}\text{C}$ -NMR** (100 MHz,  $\text{CDCl}_3$ )  $\delta$  20.7, 22.6, 47.0, 52.7, 69.3, 167.3, 169.4; **HRMS** (ES+) exact mass calculated for  $[\text{M}+\text{Na}]^+$  ( $\text{C}_7\text{H}_{10}\text{NaO}_4$ ) requires  $m/z$  181.0471, found  $m/z$  181.0474.

## 2.2 Synthesis and characterization of **13** and **14**

Methyl (3*S*)-3-[(1*S*)-1-(furan-3-yl)-2-nitroethyl]-2-oxooxane-3-carboxylate (**13**) and methyl (3*R*)-3-[(1*S*)-1-(furan-3-yl)-2-nitroethyl]-2-oxooxane-3-carboxylate (**14**)

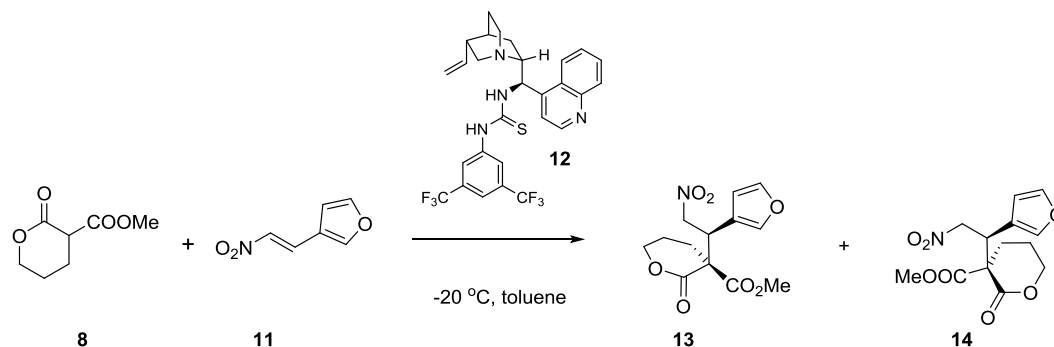

Catalyst **12** (0.040 mmol, 22.6 mg) was added to a solution of pronucleophile **8** (0.22 mmol, 34.8 mg) and electrophile **11** (0.20 mmol, 27.8 mg) in toluene (1.0 mL) at  $-20\text{ }^{\circ}\text{C}$ . The resulting mixture was stirred at  $-20\text{ }^{\circ}\text{C}$ . After 24 h AcOH (glacial, 0.20 mmol, 11  $\mu\text{L}$ ) was added and the mixture concentrated. The residue (crude dr **13/14** ~96:4) was purified by column chromatography (PE/EtOAc/ $\text{CH}_2\text{Cl}_2$  6:4:1) affording an epimeric mixture of **13/14** in 99% yield (59 mg, dr 95:5) as a colourless oil and 90:10 er for the major diastereomer **13** [determined by HPLC, Chiralpak AS-H, hexane/isopropanol = 80:20, 1 mL/min,  $\lambda = 220\text{ nm}$ ,  $t$  (major) = 30.97 min,  $t$  (minor) = 36.00 min].

Characterisation corresponding to a 95:5 epimeric mixture:

**IR** (film) 1735 (C=O), 1680 (C=O), 1554, 1379 ( $\text{NO}_2$ );  $[\alpha]_{\text{D}}^{25} = +14.5$  ( $c = 0.27$ ,  $\text{CHCl}_3$ );  **$^1\text{H}$  NMR** (400 MHz,  $\text{CDCl}_3$ )  $\delta$  1.82 - 2.03 (m, 3 H), 2.26 - 2.36 (m, 1 H), 3.74 (s, 3 H), 4.07 - 4.17 (m, 1 H), 4.20 - 4.29 (m, 2 H), 4.72 (dd,  $J = 13.2, 10.8\text{ Hz}$ , 1 H), 5.03 (dd,  $J = 13.2, 3.7\text{ Hz}$ , 1 H), 6.41 (d,  $J = 1.0\text{ Hz}$ , 1 H), 7.33 - 7.43 (m, 2 H);  **$^{13}\text{C}$  NMR** (100 MHz,  $\text{CDCl}_3$ )  $\delta$  20.1, 27.1, 39.8, 53.3, 56.4, 69.0, 76.6, 110.5, 119.1, 142.2, 143.4, 168.3, 169.9; **HRMS** (ES+) exact mass calculated for  $[\text{M}+\text{Na}]^+$  ( $\text{C}_{13}\text{H}_{15}\text{NNaO}_7$ ) requires  $m/z$  320.0741, found  $m/z$  320.0740.

## 2.3 Synthesis and characterization of *rac*-**13** and *rac*-**14**

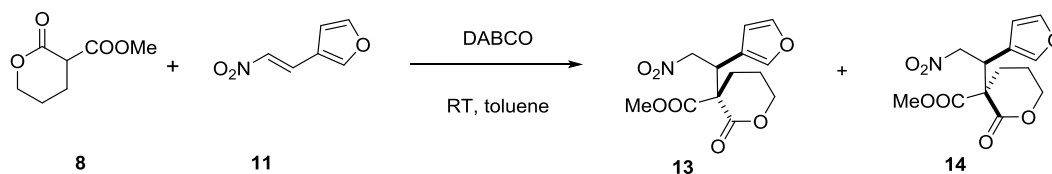

A solution of pronucleophile **8** (0.00400 mol, 0.633 g), electrophile **11** (0.00480 mol, 0.668 g) and DABCO (0.00080 mol, 0.090 g) in toluene (4.0 mL) was stirred at rt. After 1 h another portion of DABCO (0.00040 mol, 0.045 g) was added and the resulting mixture stirred for another 16 h and then it was concentrated in vacuo. The residue (dr **13/14** ~45:55) was purified by column chromatography (PE/Et<sub>2</sub>O 1:2 → Et<sub>2</sub>O, dr **13/14** 57:43) and trituration (Et<sub>2</sub>O) affording an epimeric mixture of **13/14** (0.620 g, 52%, dr **13/14** 64:36) as a colourless solid. Iterative recrystallisations afforded crystals of single diastereomer **14** suitable for X-ray analysis.

Characterisation for *rac*-**14**:

**M.p.** 131-132 °C (EtOH); **IR** (film) 2966, 2941 (C-H), 1729, 1710 (C=O), 1553, 1383 (NO<sub>2</sub>); **<sup>1</sup>H NMR** (400 MHz, CDCl<sub>3</sub>): δ 1.63 - 1.72 (m, 1 H), 1.83 - 2.02 (m, 2 H), 2.14 - 2.24 (m, 1 H), 3.84 (s, 3 H), 3.96 (dd, 1 H, *J* = 10.5, 2.9 Hz), 3.99 - 4.08 (m, 1 H), 4.28 - 4.38 (m, 1 H), 4.74 (dd, 1 H, *J* = 13.6, 2.8 Hz), 5.15 (dd, 1 H, *J* = 13.7, 10.5 Hz), 6.32 (t, 1 H, *J* = 1.3 Hz), 7.36 - 7.41 (m, 2 H); **<sup>13</sup>C NMR** (100 MHz, CDCl<sub>3</sub>) δ 20.2, 30.5, 41.0, 53.6, 57.3, 69.8, 78.4, 109.7, 119.4, 142.3, 144.1, 168.3, 171.1; **HRMS** (ES<sup>+</sup>) exact mass calculated for [M+Na]<sup>+</sup> (C<sub>13</sub>H<sub>15</sub>NNaO<sub>7</sub>) requires *m/z* 320.0741, found *m/z* 320.0743.

For the characterisation of **13** see section 2.2.

## 2.4 Synthesis and characterisation of **15**

Methyl (3*S*,4*S*,5*R*)-1-butyl-4-(furan-3-yl)-3-(3-hydroxypropyl)-5-nitro-2-oxopiperidine-3-carboxylate (**15**)

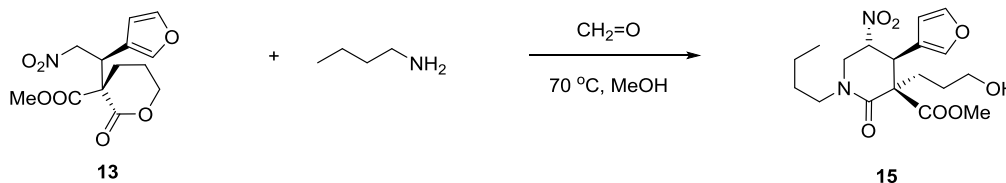

Butylamine (0.30 mmol, 0.022 g, 30  $\mu\text{L}$ ) was added to a solution of Michael adduct **13** (59 mg, 0.20 mmol) and formaldehyde (0.30 mmol, 0.0090 g, 22  $\mu\text{L}$  of 37% solution in water) in MeOH (0.4 mL) at rt. The resulting mixture was stirred at reflux. After 1 h the mixture was cooled to rt and concentrated in vacuo. The residue was dissolved in EtOAc and washed with HCl (0.5 M, 2 mL). The separated aqueous phase was extracted with EtOAc (2  $\times$  4 mL). The combined organics were dried ( $\text{Na}_2\text{SO}_4$ ) and concentrated in vacuo. The residue was purified by column chromatography ( $\text{Et}_2\text{O}$ ) to afford title compound **15** (0.048 g, 63%) as a pale-yellow oil.

**IR** (film) 3426 (OH), 2956, 2934, 2874 (C-H), 1750, 1640 (C=O), 1556, 1348 ( $\text{NO}_2$ );  $[\alpha]_{\text{D}}^{25} = +70.8$  ( $c = 1.2$ ,  $\text{CHCl}_3$ );  **$^1\text{H}$  NMR** (400 MHz,  $\text{CDCl}_3$ )  $\delta$  0.95 (t,  $J = 7.5$  Hz, 3 H), 1.34 (sxt,  $J = 7.5$  Hz, 2 H), 1.40 - 1.74 (m, 4 H), 1.83 (ddd,  $J = 14.0, 11.5, 4.5$  Hz, 1 H), 2.01 - 2.07 (m, 1 H), 2.35 (ddd,  $J = 14.0, 11.5, 5.0$  Hz, 1 H), 3.36 (ddd,  $J = 13.5, 8.5, 6.5$  Hz, 1 H), 3.51 - 3.63 (m, 2 H), 3.65 (s, 3 H), 3.67 - 3.79 (m, 2 H), 3.80 - 3.90 (m, 2 H), 5.75 (ddd,  $J = 12.0, 8.5, 6.5$  Hz, 1 H), 6.20 - 6.25 (m, 1 H), 7.32 - 7.37 (m, 2 H);  **$^{13}\text{C}$  NMR** (100 MHz,  $\text{CDCl}_3$ )  $\delta$  13.7, 19.9, 27.0, 28.3, 28.8, 39.5, 48.0, 49.5, 52.8, 58.4, 62.1, 82.0, 109.1, 118.0, 141.4, 143.7, 166.3, 170.8; **HRMS** ( $\text{ES}^+$ ) exact mass calculated for  $[\text{M}+\text{Na}]^+$  ( $\text{C}_{18}\text{H}_{26}\text{N}_2\text{NaO}_7$ ) requires  $m/z$  405.1637, found  $m/z$  405.1632.



## 2.5 Synthesis and characterisation of **7** and **7'**

Methyl (3*S*)-3-[(1*S*)-2-nitro-1-[5-(pent-3-yn-1-yl)furan-3-yl]ethyl]-2-oxooxane-3-carboxylate (**7**) and methyl (3*R*)-3-[(1*S*)-2-nitro-1-[5-(pent-3-yn-1-yl)furan-3-yl]ethyl]-2-oxooxane-3-carboxylate (**7'**)

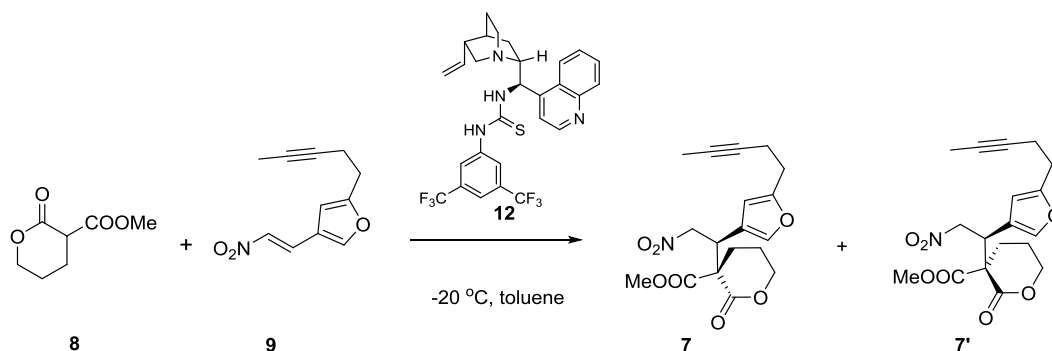

Catalyst **12** (0.16 mmol, 0.090 g) was added to a solution of pronucleophile **8** (0.880 mmol, 0.139 g) and electrophile **9** (0.800 mmol, 0.165 g) in toluene (4.0 mL) at -20 °C. The resulting mixture was stirred at -20 °C. After 36 h AcOH (glacial, 0.80 mmol, 0.048 g, 46  $\mu$ L) was added and the mixture was concentrated in vacuo. The residue (crude dr **7/7'** ~95:5) was purified by column chromatography (PE/EtOAc/CH<sub>2</sub>Cl<sub>2</sub> 6:4:1) affording an epimeric mixture of **7/7'** (0.268 g, dr 95:5) as a pale-yellow oil in 92% yield.<sup>a</sup>

**<sup>1</sup>H NMR** (400 MHz, CDCl<sub>3</sub>)  $\delta$  1.76 (t,  $J$  = 2.5 Hz, 3 H), 1.83 - 2.07 (m, 3 H), 2.27 - 2.36 (m, 1 H), 2.42 (tq,  $J$  = 7.4, 2.5 Hz, 2 H), 2.74 (t,  $J$  = 7.3 Hz, 2 H), 3.77 (s, 3 H), 4.12 - 4.30 (m, 3 H), 4.71 (dd,  $J$  = 13.1, 10.6 Hz, 1 H), 5.03 (dd,  $J$  = 13.2, 3.7 Hz, 1 H), 6.11 (s, 1 H), 7.26 (s, 1 H); **<sup>13</sup>C NMR** (100 MHz, CDCl<sub>3</sub>)  $\delta$  3.5, 17.9, 20.4, 27.1, 28.0, 40.1, 53.4, 56.6, 69.1, 76.6, 76.7, 77.7, 106.6, 119.7, 140.8, 155.7, 168.5, 170.1; **HRMS** (ES<sup>+</sup>) exact mass calculated for [M+Na]<sup>+</sup> (C<sub>18</sub>H<sub>21</sub>NNaO<sub>7</sub>) requires  $m/z$  386.1210, found  $m/z$  386.1209.

*Minor diastereomer 7' (observable)*

**<sup>1</sup>H NMR** (400 MHz, CDCl<sub>3</sub>)  $\delta$  3.86 (s, 3 H), 3.92 (dd,  $J$  = 10.5, 2.7 Hz, 1 H), 4.07 (m,  $J$  = 3.7 Hz, 1 H), 4.34 - 4.42 (m, 1 H), 5.14 (dd,  $J$  = 13.5, 10.5 Hz, 1 H), 6.03 (s, 1 H); **<sup>13</sup>C NMR** (100 MHz, CDCl<sub>3</sub>)  $\delta$  41.4, 53.7, 70.0, 78.6, 105.7, 140.5.

<sup>a</sup> The enantiomeric ratio was determined on compound **6**.

## 2.6 Synthesis and characterisation of 6

Methyl (3*R*,4*S*,5*R*)-1-(hept-5-yn-1-yl)-3-(3-hydroxypropyl)-5-nitro-2-oxo-4-[5-(pent-3-yn-1-yl)furan-3-yl]piperidine-3-carboxylate (**6**)

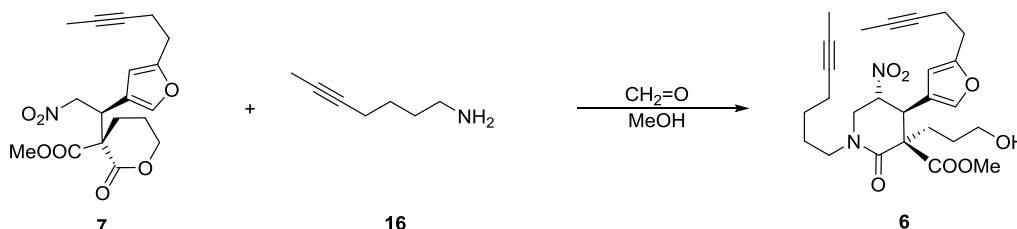

Hept-5-yn-1-amine (**16**, 1.20 mmol, 0.133 g) was added to a solution of Michael adduct **7** (267 mg, 0.736 mmol,) and formaldehyde (1.2 mmol, 0.036 g, 89  $\mu$ L of 37% solution in water) and MeOH (1.6 mL) at rt. The resulting mixture was stirred at reflux. After 1 h the mixture was cooled to rt and concentrated in vacuo. The residue was dissolved in EtOAc (8 mL) and washed with HCl (0.5 M, 8 mL). The separated aqueous phase was extracted with EtOAc (2  $\times$  8 mL). The combined organics were dried ( $\text{Na}_2\text{SO}_4$ ) and concentrated in vacuo. The residue was purified by column chromatography ( $\text{Et}_2\text{O}$ ) to afford title compound **6** (0.201 g, 56%) as a yellow oil and 91:9 er [determined by HPLC, Chiralpak OD-H, hexane/isopropanol 50:50, 0.6 mL/min,  $\lambda$  = 220 nm,  $t$  (major) = 11.81 min,  $t$  (minor) = 15.21 min].

**IR** (film) 3443 (OH), 2920, 2860 (C-H), 1752, 1646 (C=O), 1557, 1374 ( $\text{NO}_2$ );  $[\alpha]_{\text{D}}^{25} = +47.8$  ( $c = 3.9$ ,  $\text{CHCl}_3$ );  **$^1\text{H}$  NMR** (400 MHz,  $\text{CDCl}_3$ )  $\delta$  1.36 - 1.53 (m, 3 H), 1.62 - 1.87 (m, 9 H), 1.95 (br. s, 1 H), 2.10 - 2.22 (m, 2 H), 2.26 - 2.43 (m, 3 H), 2.70 (t,  $J = 7.3$  Hz, 2 H), 3.35 - 3.46 (m, 1 H), 3.48 - 3.74 (m, 7 H), 3.77 - 3.88 (m, 2 H), 5.71 (ddd,  $J = 12.0$  Hz, 9.2 Hz, 6.1 Hz, 1 H), 5.83 - 5.90 (m, 1 H), 7.14 - 7.20 (m, 1 H);  **$^{13}\text{C}$  NMR** (100 MHz,  $\text{CDCl}_3$ )  $\delta$  3.4, 3.5, 17.6, 18.3, 25.8, 25.9, 27.2, 27.8, 28.3, 39.8, 47.6, 49.5, 52.7, 58.4, 62.2, 76.2, 76.6, 77.5, 78.4, 82.0, 105.0, 118.4, 139.9, 155.9, 166.6, 170.8; **HRMS** ( $\text{ES}^+$ ) exact mass calculated for  $[\text{M}+\text{Na}]^+$  ( $\text{C}_{26}\text{H}_{34}\text{N}_2\text{NaO}_7$ ) requires  $m/z$  509.2258, found  $m/z$  509.2265.

## 2.7 Synthesis of *rac*-6

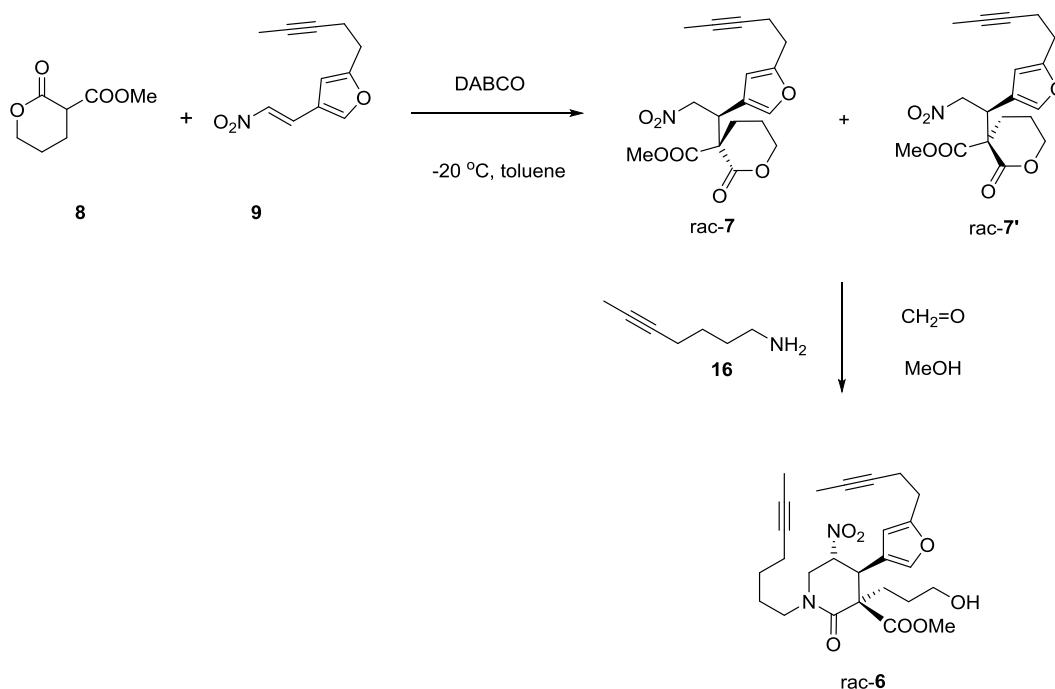

A solution of pronucleophile **8** (2.20 mol, 0.348 g), electrophile **9** (2.00 mmol, 0.410 g) and DABCO (1.00 mol, 0.112 g) in toluene (2.0 mL) was stirred at rt with exclusion of light. After 24 h another portion of DABCO (1.00 mmol, 0.112 g) was added and the resulting mixture stirred for another 24 h before being concentrated in vacuo. The residue (dr **7/7'** ~36:64) was purified by column chromatography (PE/Et<sub>2</sub>O 1:2  $\rightarrow$  Et<sub>2</sub>O), affording an brown oil (0.136 g) containing an epimeric mixture of **7/7'** (dr ~50:50). This mixture was dissolved in MeOH (0.7 mL), and formaldehyde (0.54 mmol, 0.16 g, 40  $\mu\text{L}$  of 37% aqueous solution) and hept-5-yn-1-amine (**16**, 0.54 mmol, 0.060 g) were added at rt. The resulting solution was stirred at reflux. After 1 h the mixture was cooled to rt and concentrated in vacuo. The residue was dissolved in EtOAc (8 mL) and washed with HCl (0.5 M, 8 mL). The separated aqueous phase was extracted with EtOAc (2  $\times$  8 mL). The combined organics were dried (Na<sub>2</sub>SO<sub>4</sub>) and concentrated in vacuo. The residue was purified by column chromatography (Et<sub>2</sub>O) to afford title compound *rac*-**6** (0.045 g, 5% over 2 steps from nitroolefin **9**) as a yellow oil.

Characterisation data for *rac*-**6** are consistent with that given for **6** (section 2.6).

## 2.8 Synthesis and characterization of **17**

Methyl (3*R*,4*S*)-1-(hept-5-yn-1-yl)-3-(3-hydroxypropyl)-2-oxo-4-[5-(pent-3-yn-1-yl)furan-3-yl]piperidine-3-carboxylate (**17**)

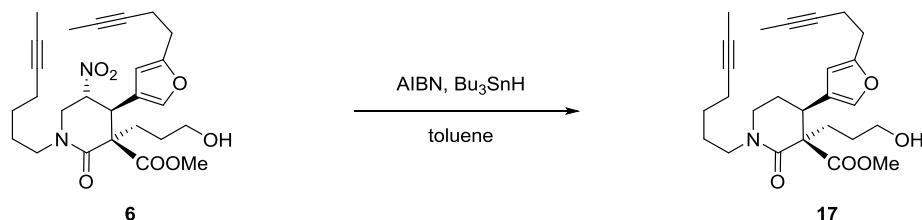

To a solution of spirocycle **6** (0.164 mmol, 0.0800 g) in toluene (6.6 mL) was added Bu<sub>3</sub>SnH (0.82 mmol, 0.24 g, 0.22 mL) and AIBN (0.082 mmol, 0.013 g) under an atmosphere of Ar. The resulting mixture was degassed and filled with N<sub>2</sub> (this operation was repeated 5 times). The suspension was stirred at reflux for 20 min then cooled to rt and concentrated in vacuo. The residue was purified by column chromatography (MTBE/PE 3:1 → MTBE) to afford title compound **17** (0.051 g, 71%) as a pale-yellow oil.

**IR** (film) 3420 (OH), 2920, 2861 (C-H), 1744 (C=O), 1621 (C=O); [ $\alpha$ ]<sub>D</sub><sup>25</sup> = +63.3 (c = 2.4, CHCl<sub>3</sub>); **<sup>1</sup>H NMR** (400 MHz, CDCl<sub>3</sub>)  $\delta$  1.31 - 1.54 (m, 3 H), 1.60 - 1.79 (m, 9 H), 1.80 - 1.94 (m, 2 H), 2.06 (br. s., 1 H), 2.12 - 2.31 (m, 3 H), 2.39 (tq, *J* = 7.4, 2.4 Hz, 2 H), 2.61 (dq, *J* = 12.3, 5.5 Hz, 1 H), 2.72 (t, *J* = 7.5 Hz, 2 H), 3.05 (dd, *J* = 13.3, 3.1 Hz, 1 H), 3.31 - 3.63 (m, 8 H), 3.63 - 3.71 (m, 1 H), 5.86 (s, 1 H), 7.10 (s, 1 H); **<sup>13</sup>C NMR** (100 MHz, CDCl<sub>3</sub>)  $\delta$  3.40, 3.41, 17.8, 18.4, 25.3, 26.0, 26.2, 27.3, 27.9, 28.7, 35.7, 47.2, 47.4, 51.9, 58.7, 62.4, 75.8, 76.3, 77.8, 78.8, 105.6, 124.4, 138.0, 155.0, 168.4, 171.7; **HRMS** (ES<sup>+</sup>) exact mass calculated for [M+Na]<sup>+</sup> (C<sub>26</sub>H<sub>35</sub>NNaO<sub>5</sub>) requires *m/z* 464.2407, found *m/z* 464.2405.

## 2.9 Synthesis and characterisation of **18**

(6*R*,11*S*)-8-(Hept-5-yn-1-yl)-11-[5-(pent-3-yn-1-yl)furan-3-yl]-2-oxa-8-azaspiro[5.5]undecane-1,7-dione (**18**)

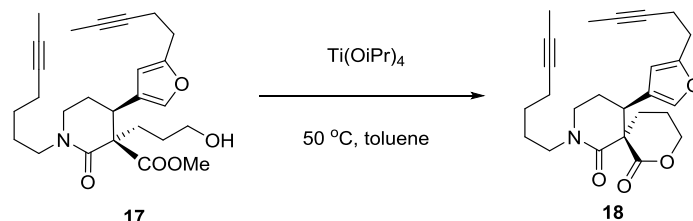

$\text{Ti}(\text{OiPr})_4$  (1.1 mmol, 0.31 g, 0.30 mL) was added dropwise to a solution of ester **17** (1.00 mmol, 0.441 g) in toluene (10 mL) at rt and the resulting solution was stirred at  $50\text{ }^\circ\text{C}$ . After 2 h the mixture was cooled to rt, concentrated in vacuo and the residue was filtered through a plug of silica gel eluted with  $\text{Et}_2\text{O}$ . The filtrate was concentrated in vacuo and the residue was purified by column chromatography (PE/ $\text{Et}_2\text{O}$  1:2  $\rightarrow$   $\text{Et}_2\text{O}$ ) to afford **18** (0.344 g, 84%) as a pale-yellow oil.

**IR** (film) 2920, 2860 (C-H), 1716, 1631 (C=O);  $[\alpha]_{\text{D}}^{25} = +70.9$  ( $c = 2.7$ ,  $\text{CHCl}_3$ );  **$^1\text{H}$  NMR** (400 MHz,  $\text{CDCl}_3$ )  $\delta$  1.46 - 1.60 (m, 2 H), 1.64 - 1.79 (m, 10 H), 1.83 - 1.97 (m, 1 H), 2.10 - 2.22 (m, 2 H), 2.28 - 2.47 (m, 4 H), 2.71 - 2.83 (m, 3 H), 2.89 - 3.07 (m, 1 H), 3.32 - 3.52 (m, 4 H), 3.72 (dt,  $J = 11.0$  Hz, 2.2 Hz, 1 H), 4.22 - 4.34 (m, 1 H), 6.06 (s, 1 H) 7.22 (s, 1 H);  **$^{13}\text{C}$  NMR** (100 MHz,  $\text{CDCl}_3$ ) 3.36, 3.42, 17.8, 18.4, 22.7, 25.6, 26.0, 26.1, 27.9, 32.9, 42.5, 47.3, 47.4, 53.5, 70.0, 75.7, 76.3, 77.7, 78.7, 106.0, 124.1, 138.7 155.6, 169.6, 170.2; **HRMS** (ES $^{+}$ ) exact mass calculated for  $[\text{M}+\text{Na}]^{+}$  ( $\text{C}_{25}\text{H}_{31}\text{NNaO}_4$ ) requires  $m/z$  432.2145, found  $m/z$  432.2152.

## 2.10 Synthesis and characterisation of 20

(3*S*,4*S*)-1-(Hept-5-yn-1-yl)-*N*-(hex-5-en-1-yl)-3-(3-hydroxypropyl)-2-oxo-4-[5-(pent-3-yn-1-yl)furan-3-yl]piperidine-3-carboxamide (**20**)

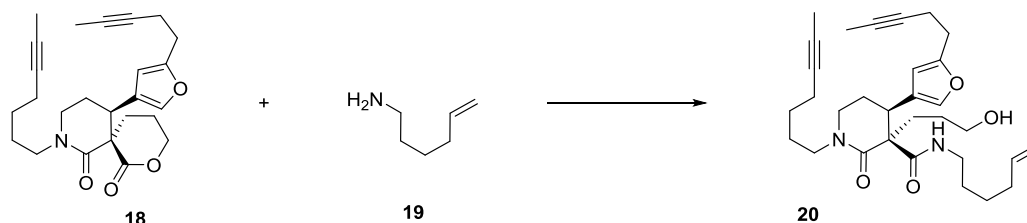

A mixture of lactone **18** (0.195 mmol, 0.0800 g) and amine **19** (0.78 mmol, 0.077 g) was stirred at 130 °C. After 24 h the mixture was cooled to rt and purified by column chromatography (EtOAc) to afford amide **20** (0.066 g, 67%) as a pale-yellow oil.

**IR** (film) 3379 (OH, NH), 2921, 2859 (C-H), 1654 (C=O);  $[\alpha]_D^{25} = -13.8$  ( $c = 1.0$ , CHCl<sub>3</sub>); **<sup>1</sup>H NMR** (400 MHz, CDCl<sub>3</sub>)  $\delta$  1.23 - 1.72 (m, 10 H), 1.73 - 1.79 (m, 6 H), 1.82 - 2.20 (m, 8 H), 2.24 - 2.43 (m, 3 H), 2.71 (t,  $J = 7.7$  Hz, 2 H), 3.03 - 3.23 (m, 3 H), 3.30 (dd,  $J = 8.2, 5.0$  Hz, 2 H), 3.44 (t,  $J = 4.5$  Hz, 1 H), 3.49 - 3.65 (m, 3 H), 4.90 - 5.03 (m, 2 H), 5.75 (ddt,  $J = 17.1, 10.2, 6.6$  Hz, 1 H), 5.89 (s, 1 H), 7.05 (s, 1 H), 8.32 (br. s., 1 H); **<sup>13</sup>C NMR** (100 Hz, CDCl<sub>3</sub>)  $\delta$  3.41, 3.43, 17.8, 18.4, 23.8, 25.8, 26.2, 26.3, 28.0, 28.4, 28.7, 33.3, 34.7, 37.0, 39.0, 45.5, 47.2, 54.7, 62.4, 75.9, 76.1, 77.9, 78.7, 106.4, 114.6, 125.2, 137.7, 138.5, 154.5, 170.9, 172.2; **HRMS** (ES<sup>+</sup>) exact mass calculated for  $[M+Na]^+$  (C<sub>31</sub>H<sub>44</sub>N<sub>2</sub>NaO<sub>4</sub>) requires  $m/z$  531.3193, found  $m/z$  531.3204.

## 2.11 Synthesis and characterisation of 21

(3*S*,4*S*)-1-(Hept-5-yn-1-yl)-*N*-(hex-5-en-1-yl)-2-oxo-3-(3-oxopropyl)-4-[5-(pent-3-yn-1-yl)furan-3-yl]piperidine-3-carboxamide (**21**)

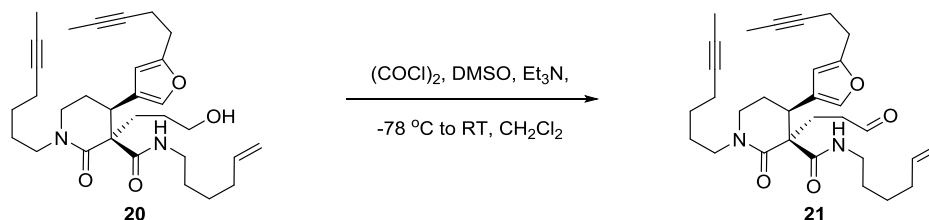

To a solution of oxalyl chloride (0.083 mmol, 0.010 g, 8  $\mu\text{L}$ ) in  $\text{CH}_2\text{Cl}_2$  (4 mL) was added dropwise DMSO (0.17 mmol, 0.013 g, 12  $\mu\text{L}$ ) at  $-78\text{ }^\circ\text{C}$  and the mixture was stirred at  $-78\text{ }^\circ\text{C}$ . After 3 min a solution of alcohol **20** (0.079 mmol, 0.040 g) in  $\text{CH}_2\text{Cl}_2$  (1 mL) was added dropwise and the solution was stirred at  $-78\text{ }^\circ\text{C}$ . After 15 min  $\text{Et}_3\text{N}$  (5 equiv, 0.39 mmol, 0.040 g, 55  $\mu\text{L}$ ) was added dropwise. The resulting mixture was stirred for 5 min at  $-78\text{ }^\circ\text{C}$  and warmed to rt over 30 min. The mixture was concentrated by a stream of nitrogen and the residue was purified by column chromatography ( $\text{Et}_2\text{O}$ ) to afford the title compound **21** (0.035 g, 88%) as a pale-yellow oil.

**IR** (film) 2920, 2858 (C-H), 1636 (C=O), 1493, 1433;  $[\alpha]_{\text{D}}^{24} = +40.7$  ( $c = 0.27$ ,  $\text{CHCl}_3$ );  **$^1\text{H}$  NMR** (400 MHz,  $\text{CDCl}_3$ )  $\delta$  1.18 - 1.44 (m, 6 H), 1.51 - 1.65 (m, 2 H), 1.66 - 1.72 (m, 6 H), 1.76 - 1.89 (m, 1 H), 1.96 (q,  $J = 7.1$  Hz, 2 H), 2.06 - 2.24 (m, 4 H), 2.27 - 2.37 (m, 3 H), 2.40 - 2.54 (m, 1 H), 2.57 - 2.72 (m, 3 H), 3.01 - 3.12 (m, 2 H), 3.14 - 3.29 (m, 3 H), 3.30 - 3.43 (m, 2 H), 4.86 - 4.95 (m, 2 H), 5.70 (ddt,  $J = 17.0, 10.3, 6.8$  Hz, 1 H), 5.79 - 5.83 (m, 1 H), 6.97 (s, 1 H), 8.52 (t,  $J = 5.5$  Hz, 1 H), 9.66 (s, 1 H);  **$^{13}\text{C}$  NMR** (100 MHz,  $\text{CDCl}_3$ )  $\delta$  3.4, 3.4, 17.7, 18.4, 23.7, 25.7, 26.2, 26.3, 27.9, 28.7, 30.9, 33.2, 37.3, 39.0, 40.1, 45.2, 47.4, 53.6, 76.0, 76.1, 77.9, 78.4, 106.4, 114.7, 125.0, 137.6, 138.4, 154.6, 170.2, 172.0, 200.9; **HRMS** (ES+) exact mass calculated for  $[\text{M}+\text{Na}]^+$  ( $\text{C}_{31}\text{H}_{42}\text{N}_2\text{NaO}_4$ ) requires  $m/z$  529.3037, found  $m/z$  529.3047.

## 2.12 Synthesis and characterisation of **5**

(3*S*,4*S*)-3-(But-3-en-1-yl)-1-(hept-5-yn-1-yl)-*N*-(hex-5-en-1-yl)-2-oxo-4-[5-(pent-3-yn-1-yl)furan-3-yl]piperidine-3-carboxamide (**5**)

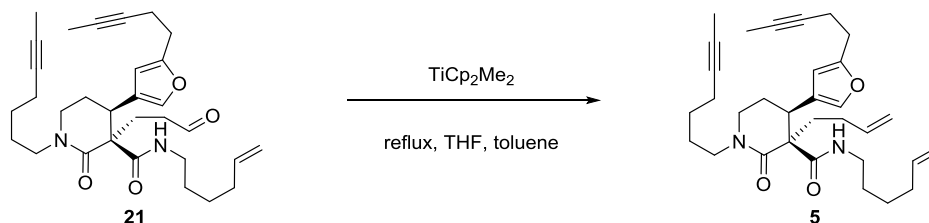

A solution of Petasis reagent<sup>4</sup> (0.21 mmol, 0.45 g of 9.7% solution in THF/toluene) was added to a solution of aldehyde **21** (0.069 mmol, 0.035 g) in toluene (3.5 mL) at rt. The resulting mixture was stirred at reflux. After 20 min, the mixture was cooled to rt and quenched by addition of NH<sub>4</sub>Cl (saturated aqueous solution, 4 mL). The resulting emulsion was extracted (Et<sub>2</sub>O, 3 × 5 mL), the combined organics were dried (Na<sub>2</sub>SO<sub>4</sub>) and concentrated in vacuo. The residue was purified by column chromatography (PE/Et<sub>2</sub>O 1:2) to afford **5** (0.0146 g, 42%) as a pale-yellow oil.

**IR** (film) 3282 (N-H), 2922, 2858 (C-H), 1666, 1640 (C=O); [ $\alpha$ ]<sub>D</sub><sup>23</sup> = -26 (c = 0.40, CHCl<sub>3</sub>); **<sup>1</sup>H NMR** (500 MHz, CDCl<sub>3</sub>)  $\delta$  1.29 - 1.51 (m, 6 H), 1.58 - 1.71 (m, 2 H), 1.74 - 1.80 (m, 6 H), 1.79 - 1.87 (m, 1 H), 1.91 - 2.12 (m, 5 H), 2.13 - 2.20 (m, 3 H), 2.24 - 2.35 (m, 1 H), 2.36 - 2.44 (m, 2 H), 2.72 (t, *J* = 7.6 Hz, 2 H), 3.08 - 3.25 (m, 3 H), 3.29 (dd, *J* = 8.5, 4.6 Hz, 2 H), 3.47 - 3.59 (m, 2 H), 4.91 - 5.05 (m, 4 H), 5.71 - 5.83 (m, 2 H), 5.90 (s, 1 H), 7.05 (s, 1 H), 8.58 (br. s., 1 H); **<sup>13</sup>C NMR** (100 MHz, CDCl<sub>3</sub>)  $\delta$  3.5, 3.5, 17.8, 18.5, 23.8, 25.9, 26.2, 26.3, 28.0, 28.7, 29.4, 33.3, 36.9, 38.3, 39.0, 45.4, 47.3, 54.4, 75.9, 76.1, 78.0, 78.6, 106.5, 114.6, 115.0, 125.4, 137.6, 137.8, 138.5, 153.9, 170.6, 172.3; **HRMS** (ES<sup>+</sup>) exact mass calculated for [M+Na]<sup>+</sup> (C<sub>32</sub>H<sub>44</sub>N<sub>2</sub>NaO<sub>3</sub>) requires *m/z* 527.3244, found *m/z* 527.3253.



### 3 Single X-ray crystal diffraction data of 14

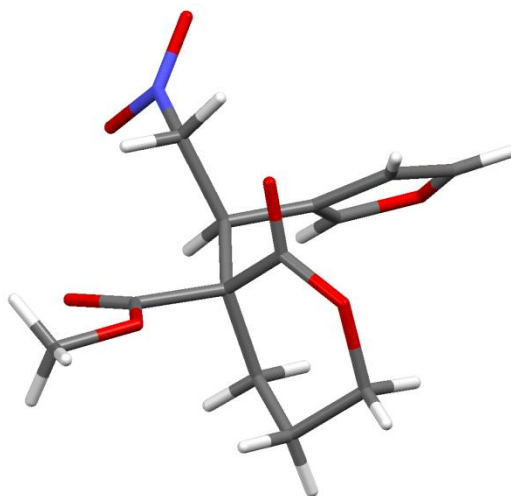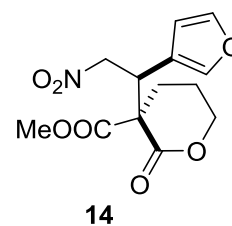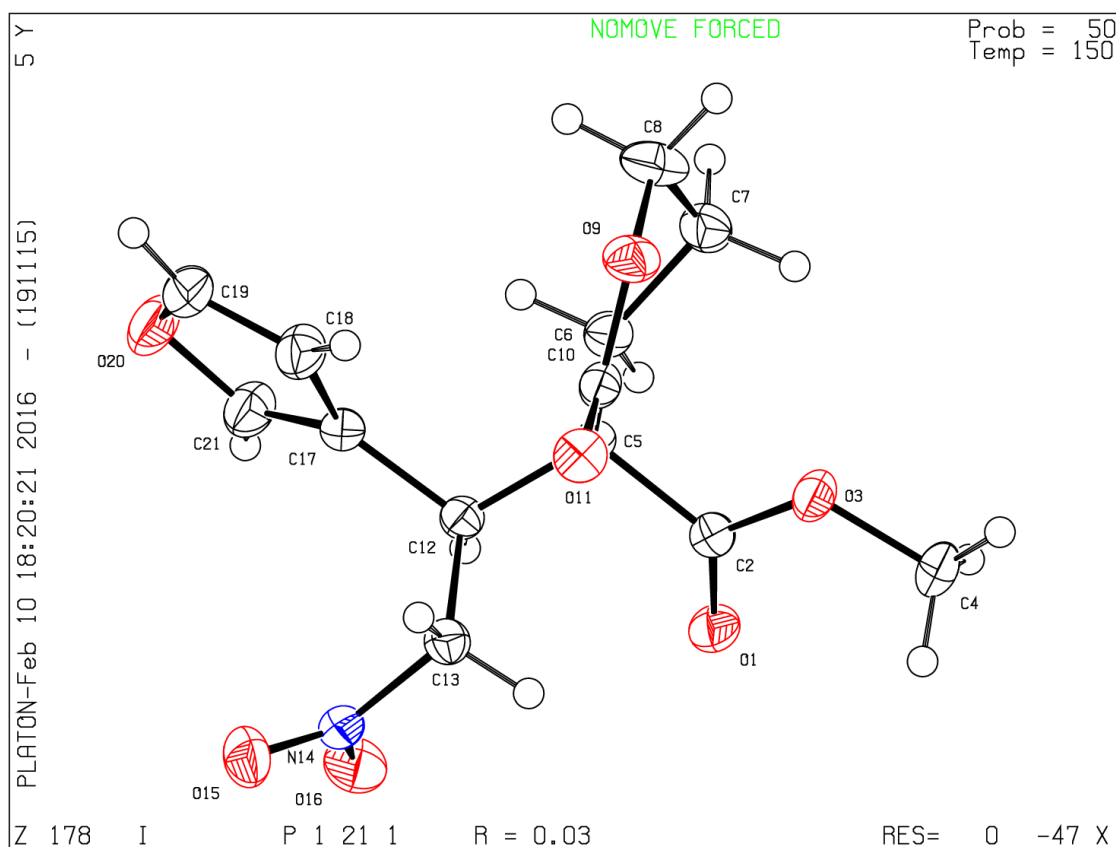

## Crystal data

$C_{13}H_{15}NO_7$

$M_r = 297.26$

Monoclinic,  $P2_1$

$a = 9.4573 (3) \text{ \AA}$

$b = 6.5026 (2) \text{ \AA}$

$c = 11.6625 (4) \text{ \AA}$

$\beta = 106.1747 (13)^\circ$

$V = 688.82 (4) \text{ \AA}^3$

## Data collection

Nonius KappaCCD  
diffractometer

Graphite monochromator

$\omega$  scans

Absorption correction: multi-scan

*DENZO/SCALEPACK* (Otwinowski  
& Minor, 1997)

$T_{\min} = 1.00$ ,  $T_{\max} = 1.00$

2908 measured reflections

1706 independent reflections

## Refinement

Refinement on  $F^2$

Least-squares matrix: full

$R[F^2 > 2\sigma(F^2)] = 0.030$

$wR(F^2) = 0.071$

$S = 0.97$

1706 reflections

190 parameters

1 restraint

$Z = 2$

$F(000) = 312$

$D_x = 1.433 \text{ Mg m}^{-3}$

Mo  $K\alpha$  radiation,  $\lambda = 0.71073 \text{ \AA}$

Cell parameters  
from 1362 reflections

$\theta = 5\text{--}27^\circ$

$\mu = 0.12 \text{ mm}^{-1}$

$T = 150 \text{ K}$

1629 reflections with  $I > 2.0\sigma(I)$

$R_{\text{int}} = 0.017$

$\theta_{\max} = 27.5^\circ$ ,  $\theta_{\min} = 5.3^\circ$

$h = -12 \rightarrow 12$

$k = -8 \rightarrow 8$

$l = -15 \rightarrow 15$

Primary atom site

location: structure-invariant direct  
methods

Hydrogen site location: difference  
Fourier map

H-atom parameters constrained

Method = Modified Sheldrick  $w =$   
 $1/[\sigma^2(F^2) + (0.03P)^2 + 0.19P]$ ,  
where  $P = (\max(F_o^2, 0) + 2F_c^2)/3$

$(\Delta/\sigma)_{\max} = 0.0001$

$\Delta\rho_{\max} = 0.21 \text{ e \AA}^{-3}$

$\Delta\rho_{\min} = -0.16 \text{ e \AA}^{-3}$

## Experimental

The crystal was placed in the cold stream of an Oxford Cryosystems open-flow nitrogen cryostat (Cosier & Glazer, 1986) with a nominal stability of 0.1 K.<sup>6</sup>

Fractional atomic coordinates and isotropic or equivalent isotropic displacement parameters ( $\text{\AA}^2$ )

|      | <i>x</i>      | <i>y</i>   | <i>z</i>      | $U_{\text{iso}}^*/U_{\text{eq}}$ |
|------|---------------|------------|---------------|----------------------------------|
| O1   | −0.08721 (13) | 0.7478 (2) | 0.05969 (10)  | 0.0273                           |
| C2   | −0.04558 (18) | 0.7324 (3) | 0.16680 (15)  | 0.0210                           |
| O3   | −0.12390 (12) | 0.7872 (2) | 0.24067 (11)  | 0.0271                           |
| C4   | −0.27248 (18) | 0.8633 (3) | 0.18546 (17)  | 0.0312                           |
| C5   | 0.10166 (17)  | 0.6356 (3) | 0.23553 (14)  | 0.0193                           |
| C6   | 0.07400 (19)  | 0.4012 (3) | 0.23895 (16)  | 0.0237                           |
| C7   | 0.0032 (2)    | 0.3474 (3) | 0.33667 (17)  | 0.0302                           |
| C8   | 0.1065 (3)    | 0.4121 (4) | 0.45394 (18)  | 0.0378                           |
| O9   | 0.14496 (14)  | 0.6312 (2) | 0.45674 (11)  | 0.0295                           |
| C10  | 0.14760 (18)  | 0.7358 (3) | 0.35917 (15)  | 0.0217                           |
| O11  | 0.18367 (13)  | 0.9148 (2) | 0.37052 (11)  | 0.0270                           |
| C12  | 0.22014 (18)  | 0.6745 (3) | 0.16807 (15)  | 0.0203                           |
| C13  | 0.23838 (19)  | 0.9012 (3) | 0.13928 (15)  | 0.0233                           |
| N14  | 0.31655 (15)  | 0.9119 (3) | 0.04381 (13)  | 0.0245                           |
| O15  | 0.43140 (14)  | 1.0090 (3) | 0.06451 (13)  | 0.0372                           |
| O16  | 0.26083 (15)  | 0.8250 (3) | −0.05085 (11) | 0.0360                           |
| C17  | 0.36734 (18)  | 0.5822 (3) | 0.23222 (15)  | 0.0226                           |
| C18  | 0.4593 (2)    | 0.6208 (4) | 0.35131 (17)  | 0.0317                           |
| C19  | 0.5787 (2)    | 0.5008 (4) | 0.36549 (17)  | 0.0350                           |
| O20  | 0.57129 (15)  | 0.3908 (3) | 0.26536 (13)  | 0.0391                           |
| C21  | 0.4410 (2)    | 0.4433 (3) | 0.18530 (17)  | 0.0319                           |
| H41  | −0.3131       | 0.9006     | 0.2491        | 0.0478*                          |
| H43  | −0.2672       | 0.9837     | 0.1381        | 0.0484*                          |
| H42  | −0.3312       | 0.7534     | 0.1363        | 0.0486*                          |
| H61  | 0.1696        | 0.3313     | 0.2539        | 0.0291*                          |
| H62  | 0.0102        | 0.3598     | 0.1618        | 0.0288*                          |
| H72  | −0.0931       | 0.4174     | 0.3234        | 0.0342*                          |
| H71  | −0.0090       | 0.1962     | 0.3388        | 0.0345*                          |
| H81  | 0.0627        | 0.3881     | 0.5187        | 0.0461*                          |
| H82  | 0.2017        | 0.3342     | 0.4706        | 0.0465*                          |
| H121 | 0.1831        | 0.6014     | 0.0901        | 0.0250*                          |
| H131 | 0.2996        | 0.9722     | 0.2091        | 0.0290*                          |
| H132 | 0.1425        | 0.9658     | 0.1068        | 0.0295*                          |
| H181 | 0.4387        | 0.7139     | 0.4080        | 0.0388*                          |
| H191 | 0.6626        | 0.4905     | 0.4348        | 0.0425*                          |
| H211 | 0.4136        | 0.3846     | 0.1092        | 0.0395*                          |

Atomic displacement parameters ( $\text{\AA}^2$ )

|    | $U_{11}$   | $U_{22}$   | $U_{33}$   | $U_{12}$   | $U_{13}$   | $U_{23}$   |
|----|------------|------------|------------|------------|------------|------------|
| O1 | 0.0254 (6) | 0.0343 (8) | 0.0196 (6) | 0.0020 (6) | 0.0019 (5) | 0.0022 (6) |

|     |             |             |             |             |            |             |
|-----|-------------|-------------|-------------|-------------|------------|-------------|
| C2  | 0.0211 (7)  | 0.0197 (8)  | 0.0215 (8)  | −0.0015 (7) | 0.0046 (6) | −0.0011 (7) |
| O3  | 0.0215 (6)  | 0.0361 (8)  | 0.0231 (6)  | 0.0083 (6)  | 0.0053 (5) | 0.0009 (6)  |
| C4  | 0.0199 (8)  | 0.0373 (12) | 0.0351 (9)  | 0.0078 (8)  | 0.0052 (7) | 0.0043 (9)  |
| C5  | 0.0198 (7)  | 0.0200 (8)  | 0.0173 (7)  | 0.0015 (7)  | 0.0041 (6) | 0.0002 (7)  |
| C6  | 0.0265 (8)  | 0.0206 (8)  | 0.0243 (8)  | 0.0010 (7)  | 0.0077 (6) | −0.0002 (7) |
| C7  | 0.0316 (9)  | 0.0241 (9)  | 0.0376 (10) | 0.0001 (8)  | 0.0139 (7) | 0.0051 (8)  |
| C8  | 0.0547 (12) | 0.0336 (11) | 0.0282 (10) | 0.0002 (10) | 0.0168 (9) | 0.0089 (9)  |
| O9  | 0.0364 (7)  | 0.0334 (8)  | 0.0192 (6)  | 0.0017 (6)  | 0.0086 (5) | 0.0020 (6)  |
| C10 | 0.0192 (7)  | 0.0267 (9)  | 0.0189 (8)  | 0.0034 (7)  | 0.0049 (6) | −0.0004 (7) |
| O11 | 0.0301 (6)  | 0.0254 (7)  | 0.0249 (6)  | −0.0009 (6) | 0.0064 (5) | −0.0056 (6) |
| C12 | 0.0218 (8)  | 0.0225 (9)  | 0.0171 (7)  | 0.0015 (7)  | 0.0061 (6) | −0.0004 (7) |
| C13 | 0.0244 (8)  | 0.0234 (9)  | 0.0232 (8)  | 0.0015 (7)  | 0.0086 (6) | 0.0006 (7)  |
| N14 | 0.0239 (7)  | 0.0238 (8)  | 0.0266 (7)  | 0.0050 (7)  | 0.0082 (6) | 0.0053 (7)  |
| O15 | 0.0249 (6)  | 0.0382 (8)  | 0.0506 (8)  | −0.0029 (6) | 0.0139 (6) | 0.0043 (7)  |
| O16 | 0.0443 (8)  | 0.0408 (9)  | 0.0243 (6)  | −0.0006 (7) | 0.0120 (6) | −0.0017 (7) |
| C17 | 0.0219 (7)  | 0.0255 (9)  | 0.0206 (8)  | 0.0015 (7)  | 0.0062 (6) | 0.0035 (7)  |
| C18 | 0.0265 (9)  | 0.0442 (12) | 0.0231 (9)  | 0.0046 (9)  | 0.0050 (7) | 0.0005 (9)  |
| C19 | 0.0257 (9)  | 0.0469 (13) | 0.0307 (9)  | 0.0065 (9)  | 0.0052 (7) | 0.0099 (10) |
| O20 | 0.0309 (7)  | 0.0458 (10) | 0.0399 (8)  | 0.0171 (7)  | 0.0086 (6) | 0.0042 (8)  |
| C21 | 0.0296 (9)  | 0.0353 (11) | 0.0301 (9)  | 0.0082 (9)  | 0.0074 (7) | −0.0002 (9) |

Geometric parameters (Å, °)

|          |             |            |           |
|----------|-------------|------------|-----------|
| O1—C2    | 1.205 (2)   | O9—C10     | 1.332 (2) |
| C2—O3    | 1.332 (2)   | C10—O11    | 1.210 (2) |
| C2—C5    | 1.535 (2)   | C12—C13    | 1.533 (3) |
| O3—C4    | 1.459 (2)   | C12—C17    | 1.509 (2) |
| C4—H41   | 0.957       | C12—H121   | 0.999     |
| C4—H43   | 0.967       | C13—N14    | 1.500 (2) |
| C4—H42   | 0.985       | C13—H131   | 0.974     |
| C5—C6    | 1.549 (3)   | C13—H132   | 0.975     |
| C5—C10   | 1.531 (2)   | N14—O15    | 1.221 (2) |
| C5—C12   | 1.559 (2)   | N14—O16    | 1.222 (2) |
| C6—C7    | 1.515 (3)   | C17—C18    | 1.441 (2) |
| C6—H61   | 0.983       | C17—C21    | 1.346 (3) |
| C6—H62   | 0.972       | C18—C19    | 1.344 (3) |
| C7—C8    | 1.503 (3)   | C18—H181   | 0.956     |
| C7—H72   | 0.991       | C19—O20    | 1.355 (3) |
| C7—H71   | 0.991       | C19—H191   | 0.965     |
| C8—O9    | 1.468 (3)   | O20—C21    | 1.366 (2) |
| C8—H81   | 0.970       | C21—H211   | 0.934     |
| C8—H82   | 1.004       |            |           |
| O1—C2—O3 | 124.63 (15) | H81—C8—H82 | 108.8     |

|            |             |               |             |
|------------|-------------|---------------|-------------|
| O1—C2—C5   | 124.24 (15) | C8—O9—C10     | 122.69 (16) |
| O3—C2—C5   | 111.05 (13) | C5—C10—O9     | 121.29 (16) |
| C2—O3—C4   | 116.49 (13) | C5—C10—O11    | 120.66 (17) |
| O3—C4—H41  | 106.8       | O9—C10—O11    | 118.02 (17) |
| O3—C4—H43  | 109.3       | C5—C12—C13    | 114.02 (14) |
| H41—C4—H43 | 109.5       | C5—C12—C17    | 112.27 (14) |
| O3—C4—H42  | 109.2       | C13—C12—C17   | 110.28 (15) |
| H41—C4—H42 | 110.6       | C5—C12—H121   | 105.3       |
| H43—C4—H42 | 111.4       | C13—C12—H121  | 106.9       |
| C2—C5—C6   | 106.36 (14) | C17—C12—H121  | 107.6       |
| C2—C5—C10  | 107.20 (13) | C12—C13—N14   | 108.44 (14) |
| C6—C5—C10  | 113.59 (15) | C12—C13—H131  | 110.4       |
| C2—C5—C12  | 110.19 (13) | N14—C13—H131  | 107.3       |
| C6—C5—C12  | 108.83 (14) | C12—C13—H132  | 110.5       |
| C10—C5—C12 | 110.56 (13) | N14—C13—H132  | 106.8       |
| C5—C6—C7   | 111.09 (16) | H131—C13—H132 | 113.1       |
| C5—C6—H61  | 107.8       | C13—N14—O15   | 118.21 (15) |
| C7—C6—H61  | 109.7       | C13—N14—O16   | 118.14 (15) |
| C5—C6—H62  | 108.3       | O15—N14—O16   | 123.65 (15) |
| C7—C6—H62  | 110.0       | C12—C17—C18   | 129.38 (16) |
| H61—C6—H62 | 109.8       | C12—C17—C21   | 125.14 (16) |
| C6—C7—C8   | 107.97 (16) | C18—C17—C21   | 105.47 (16) |
| C6—C7—H72  | 110.8       | C17—C18—C19   | 106.15 (18) |
| C8—C7—H72  | 110.5       | C17—C18—H181  | 126.3       |
| C6—C7—H71  | 109.1       | C19—C18—H181  | 127.5       |
| C8—C7—H71  | 107.8       | C18—C19—O20   | 111.16 (16) |
| H72—C7—H71 | 110.6       | C18—C19—H191  | 127.6       |
| C7—C8—O9   | 112.73 (17) | O20—C19—H191  | 121.2       |
| C7—C8—H81  | 110.7       | C19—O20—C21   | 106.10 (15) |
| O9—C8—H81  | 107.2       | O20—C21—C17   | 111.12 (17) |
| C7—C8—H82  | 110.8       | O20—C21—H211  | 120.4       |
| O9—C8—H82  | 106.4       | C17—C21—H211  | 128.5       |

#### Hydrogen-bond geometry (Å, °)

| <i>D</i> —H··· <i>A</i>       | <i>D</i> —H | H··· <i>A</i> | <i>D</i> ··· <i>A</i> | <i>D</i> —H··· <i>A</i> |
|-------------------------------|-------------|---------------|-----------------------|-------------------------|
| C4—H43···O16 <sup>i</sup>     | 0.97        | 2.45          | 3.404 (3)             | 169 (1)                 |
| C6—H62···O16 <sup>ii</sup>    | 0.97        | 2.54          | 3.349 (3)             | 141 (1)                 |
| C7—H71···O11 <sup>iii</sup>   | 0.99        | 2.54          | 3.256 (3)             | 130 (1)                 |
| C19—H191···O11 <sup>iv</sup>  | 0.97        | 2.38          | 3.315 (3)             | 163 (1)                 |
| C21—H211···O15 <sup>iii</sup> | 0.93        | 2.51          | 3.146 (3)             | 125 (1)                 |

Symmetry codes: (i)  $-x, y+1/2, -z$ ; (ii)  $-x, y-1/2, -z$ ; (iii)  $x, y-1, z$ ; (iv)  $-x+1, y-1/2, -z+1$ .

## 4 References

- (1) Manna, M. S.; Kumar, V.; Mukherjee, S. *Chem. Commun.* **2012**, 48, 5193-5195.
- (2) Ye, J.; Dixon, D. J.; Hynes, P. S. *Chem. Commun.* **2005**, 4481-4483.
- (3) Jakubec, P.; Kyle, A. F.; Calleja, J.; Dixon, D. J. *Tetrahedron Lett.* **2011**, 52, 6094-6097.
- (4) Payack, J. F.; Hughes, D. L.; Cai, D.; Cottrell, I. F.; Verhoeven, T. R. *Org. Synth.* **2002**, 79, 19-23.
- (5) Kyle, A. F.; Jakubec, P.; Cockfield, D. M.; Cleator, E.; Skidmore, J.; Dixon, D. J. *Chem. Commun.* **2011**, 47, 10037-10039.
- (6) Cosier, J.; Glazer, A. M. *J. Appl. Cryst.* **1986**, 105-107.

## 5 Supplementary data

### 5.1 $^1\text{H}$ and $^{13}\text{C}$ NMR spectra of **8**

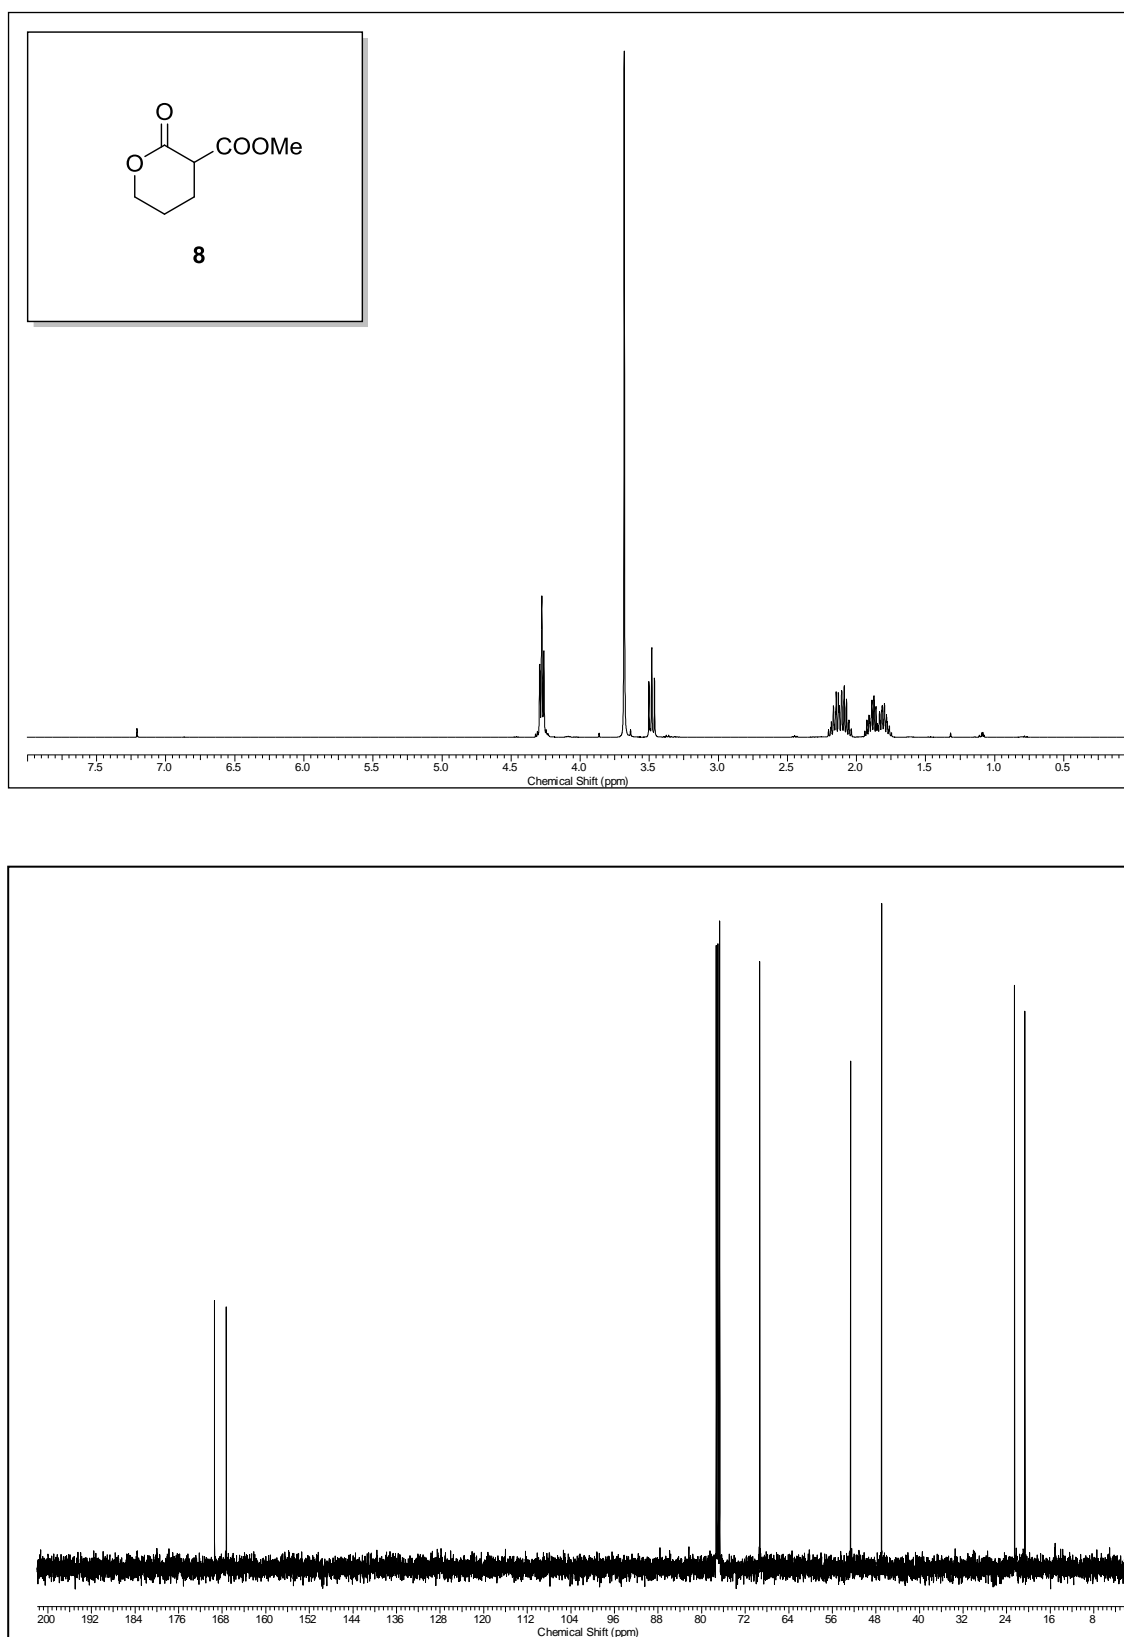

## 5.2 $^1\text{H}$ and $^{13}\text{C}$ NMR spectra of 13

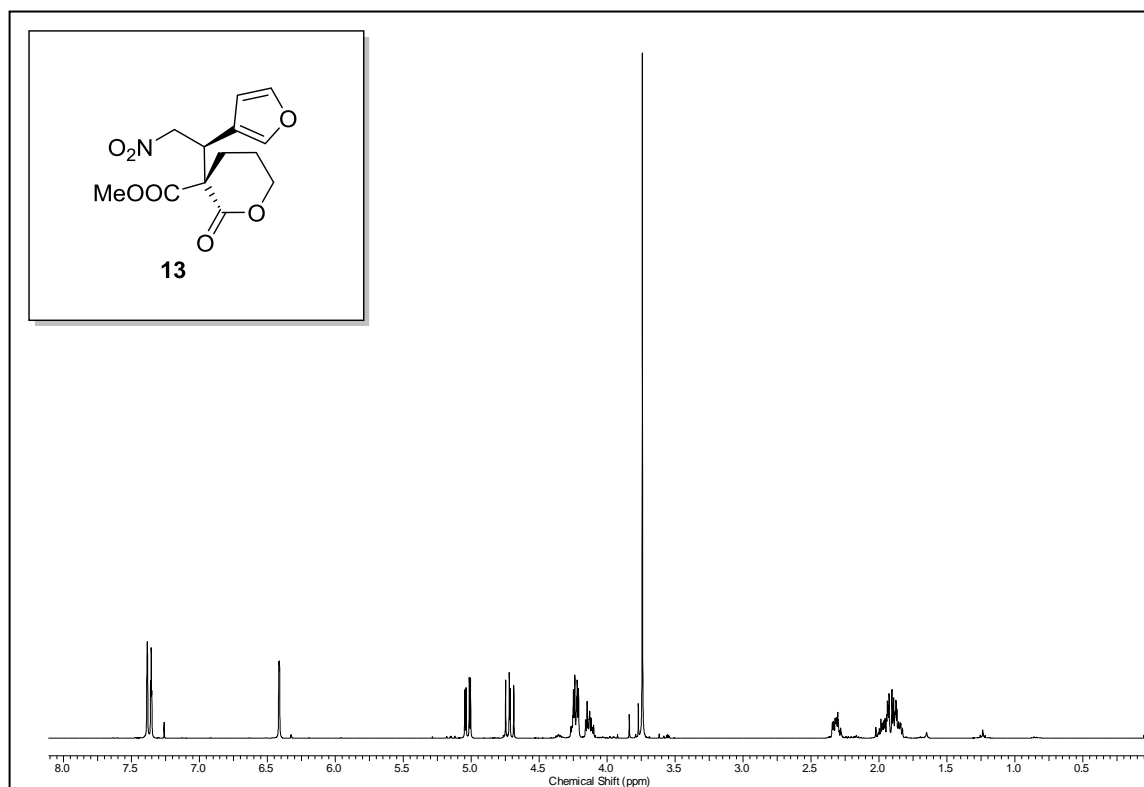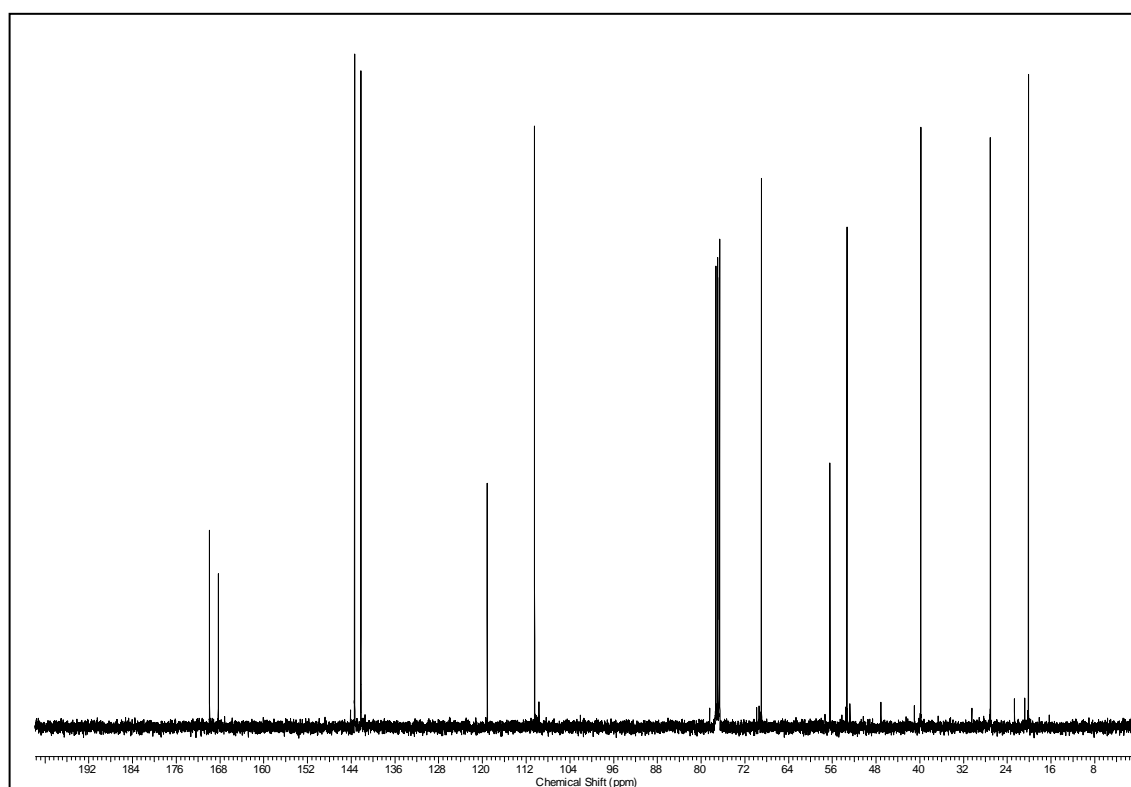



### 5.3 $^1\text{H}$ and $^{13}\text{C}$ NMR spectra of **14**

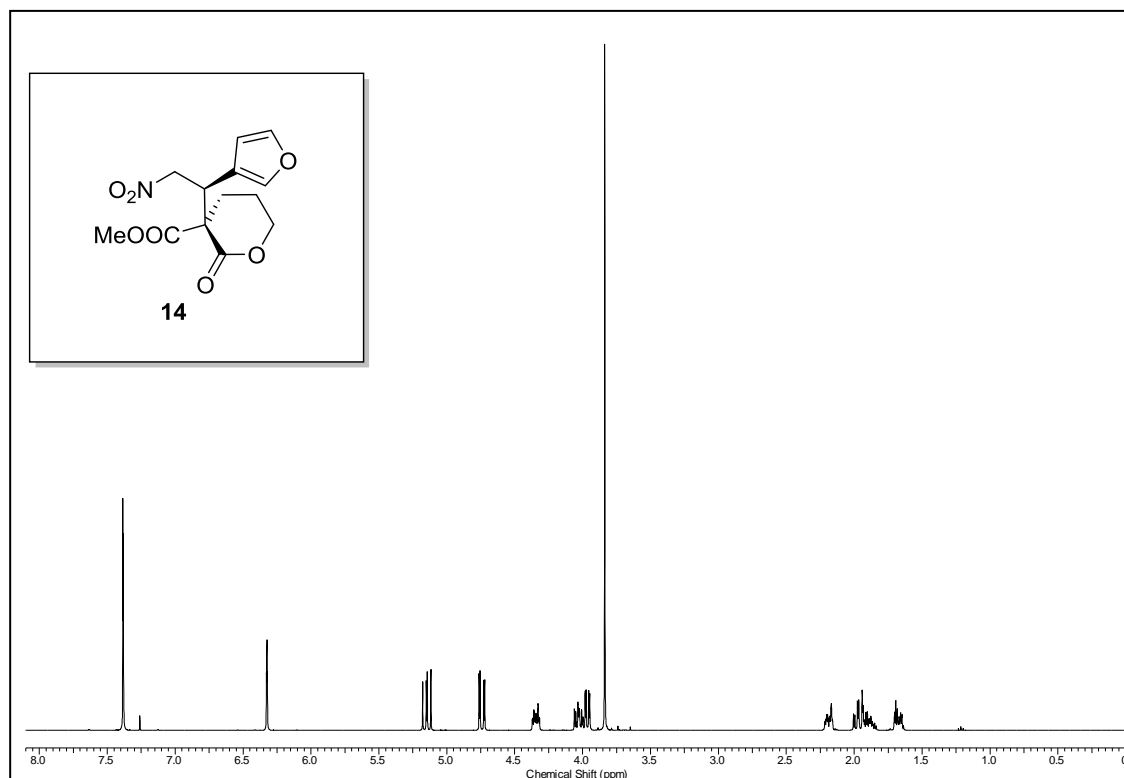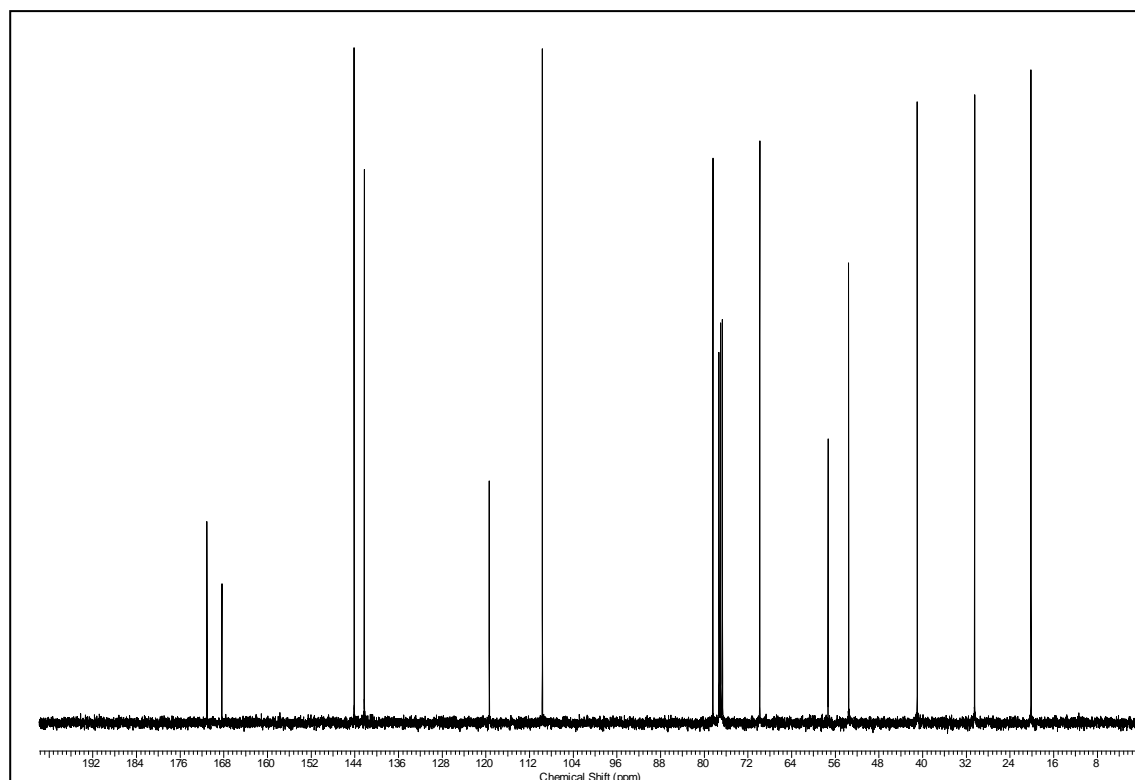

## 5.4 $^1\text{H}$ and $^{13}\text{C}$ NMR spectra of 15

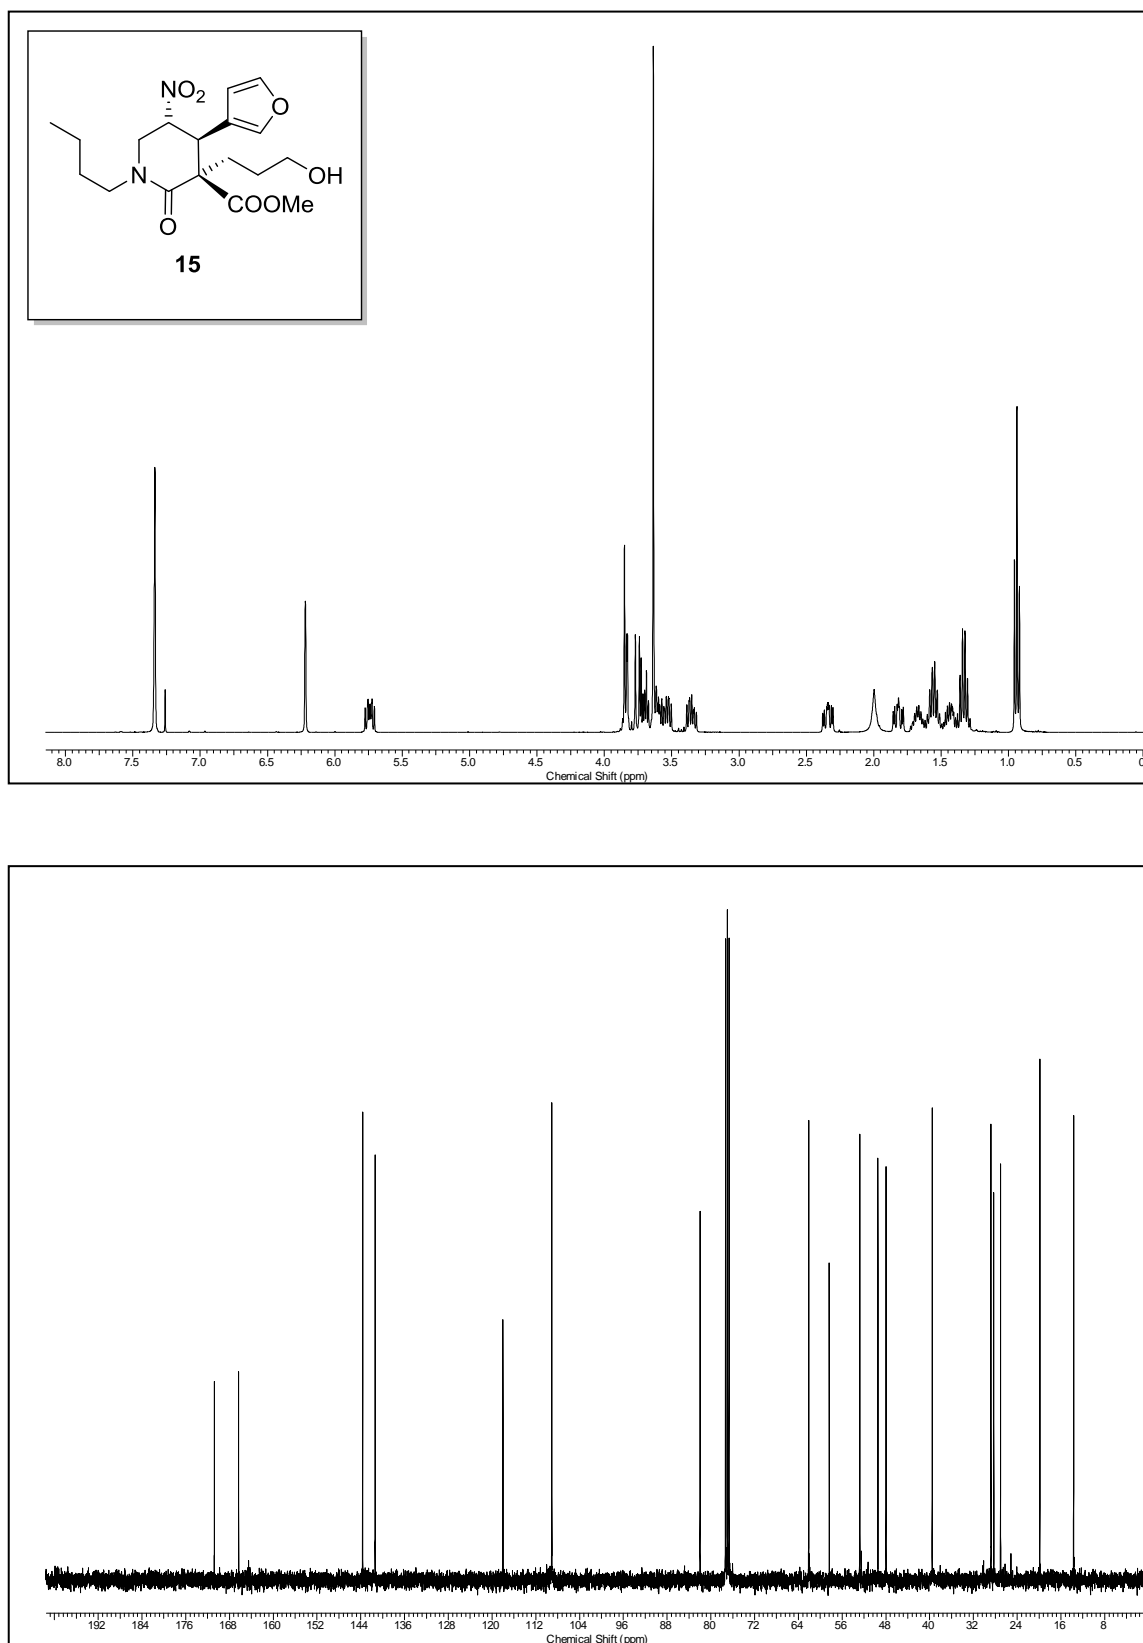

## 5.5 $^1\text{H}$ and $^{13}\text{C}$ NMR spectra of 7

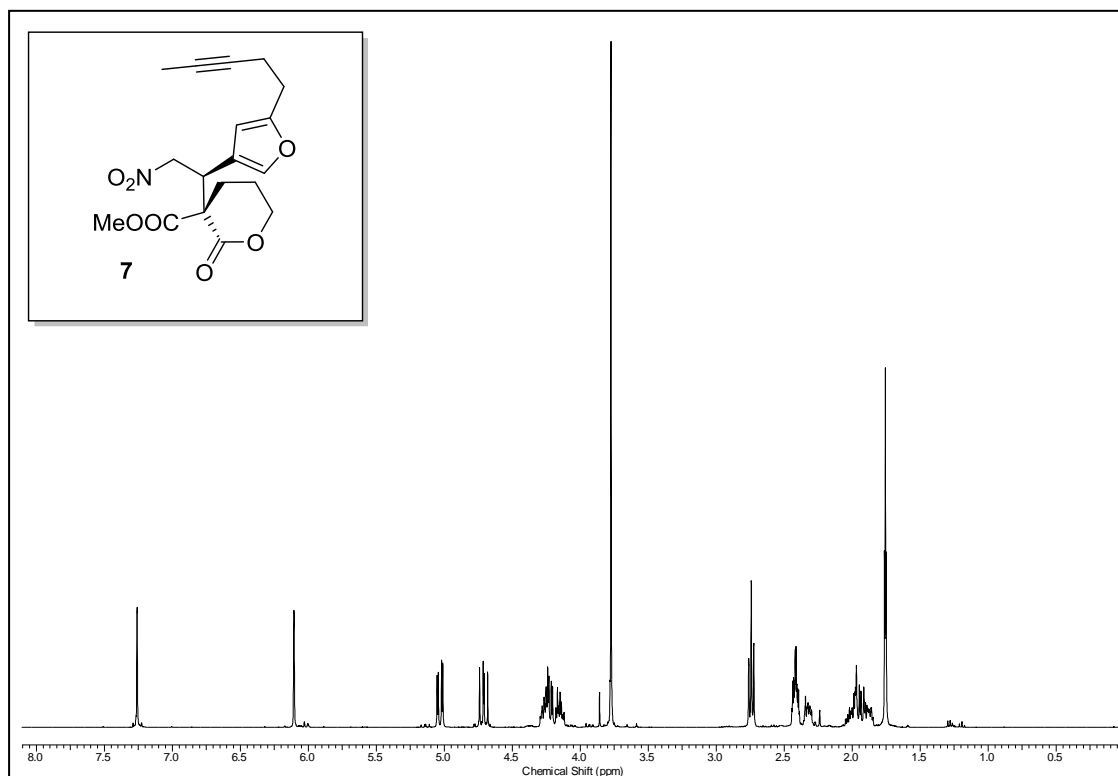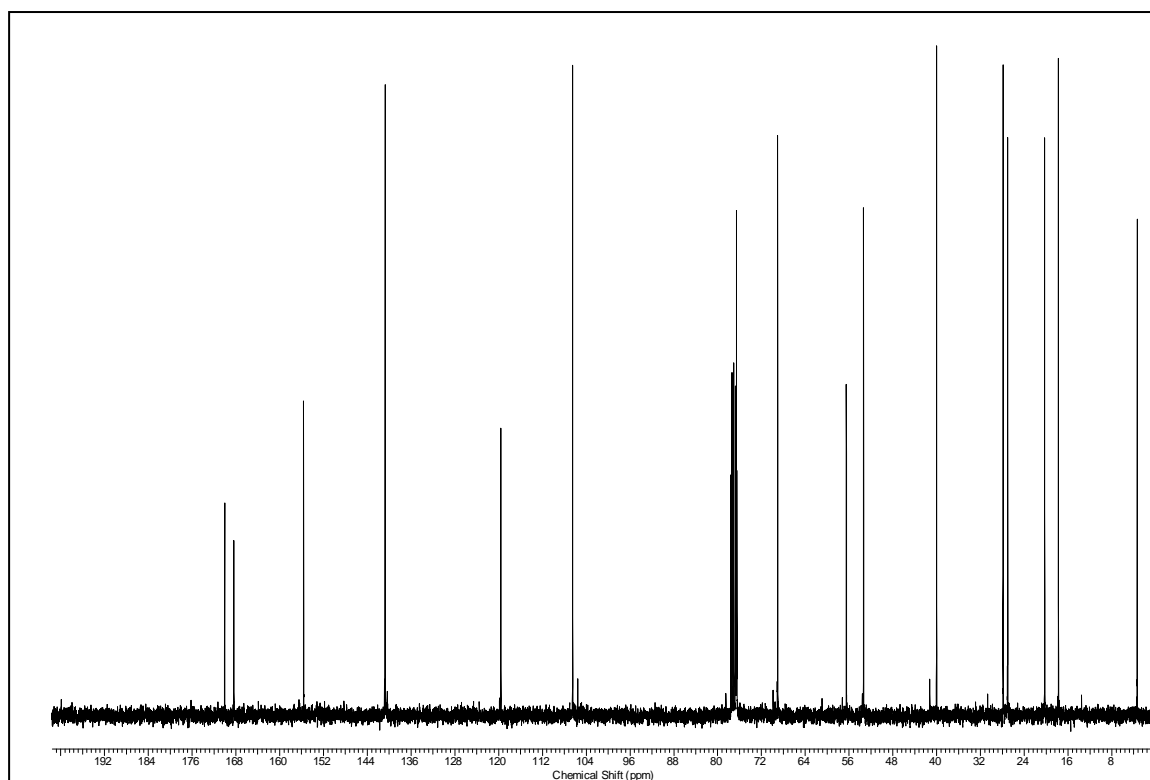

## 5.6 $^1\text{H}$ and $^{13}\text{C}$ NMR spectra of **6**

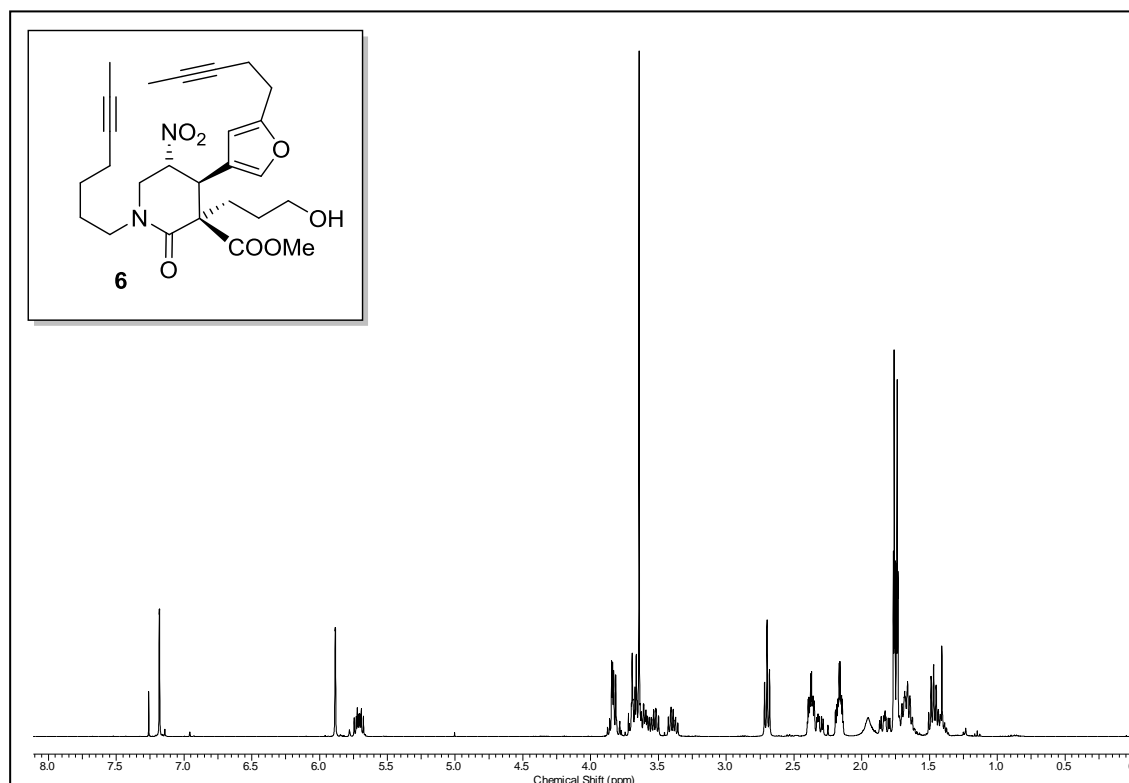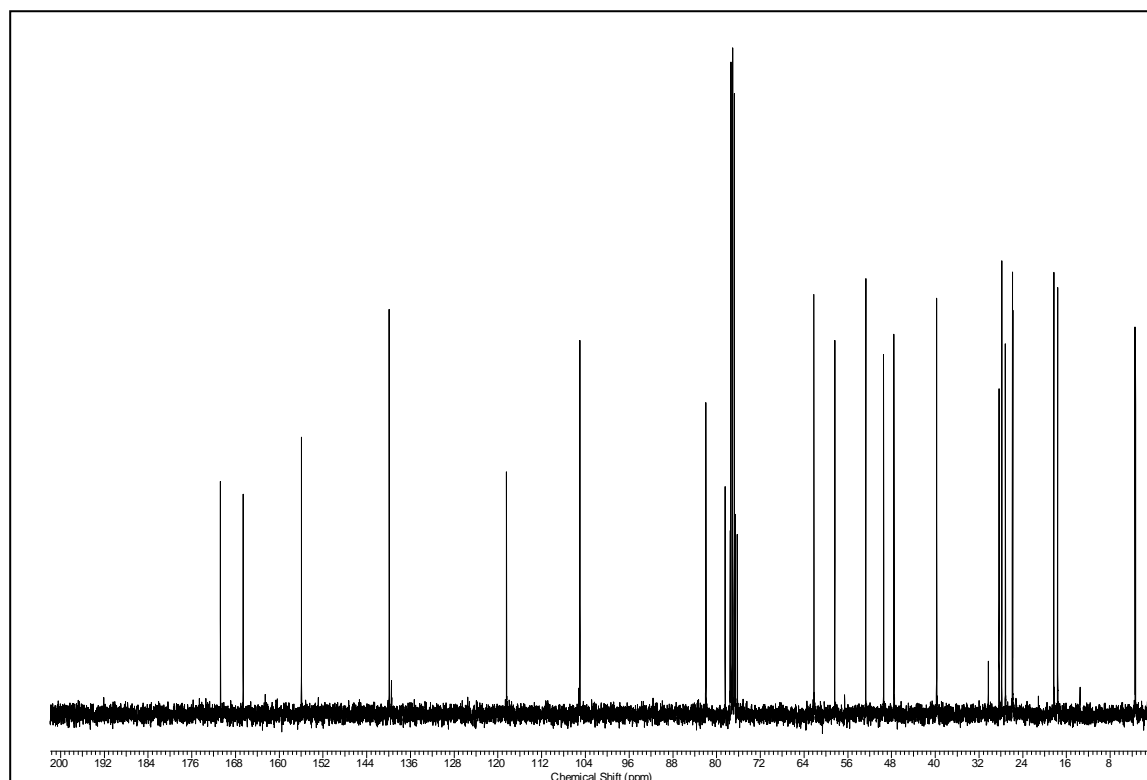

## 5.7 $^1\text{H}$ and $^{13}\text{C}$ NMR spectra of 17

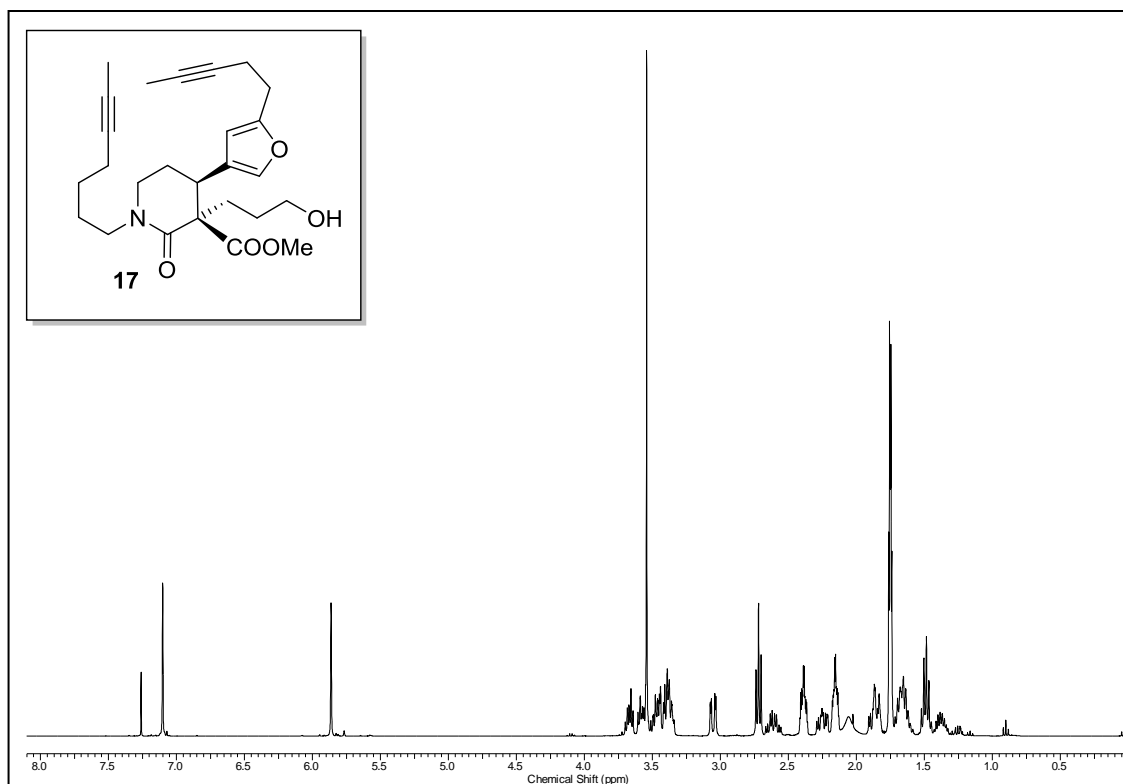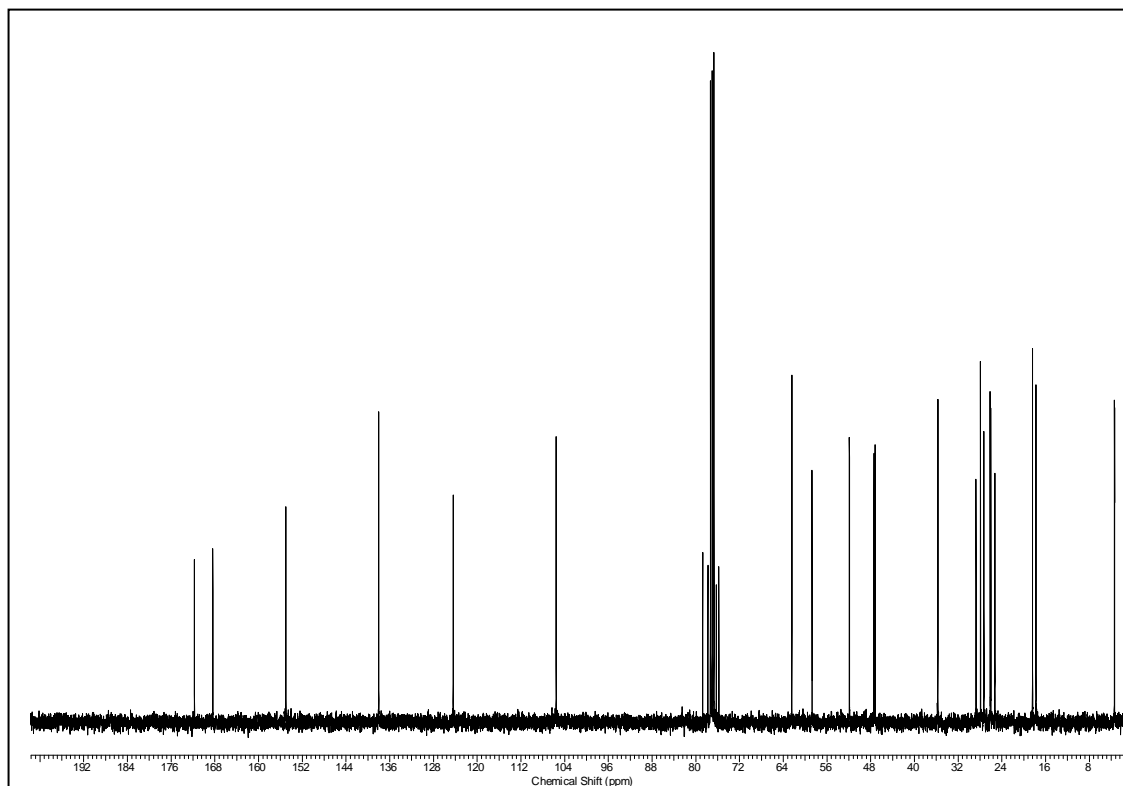

## 5.8 $^1\text{H}$ and $^{13}\text{C}$ NMR spectra of 18

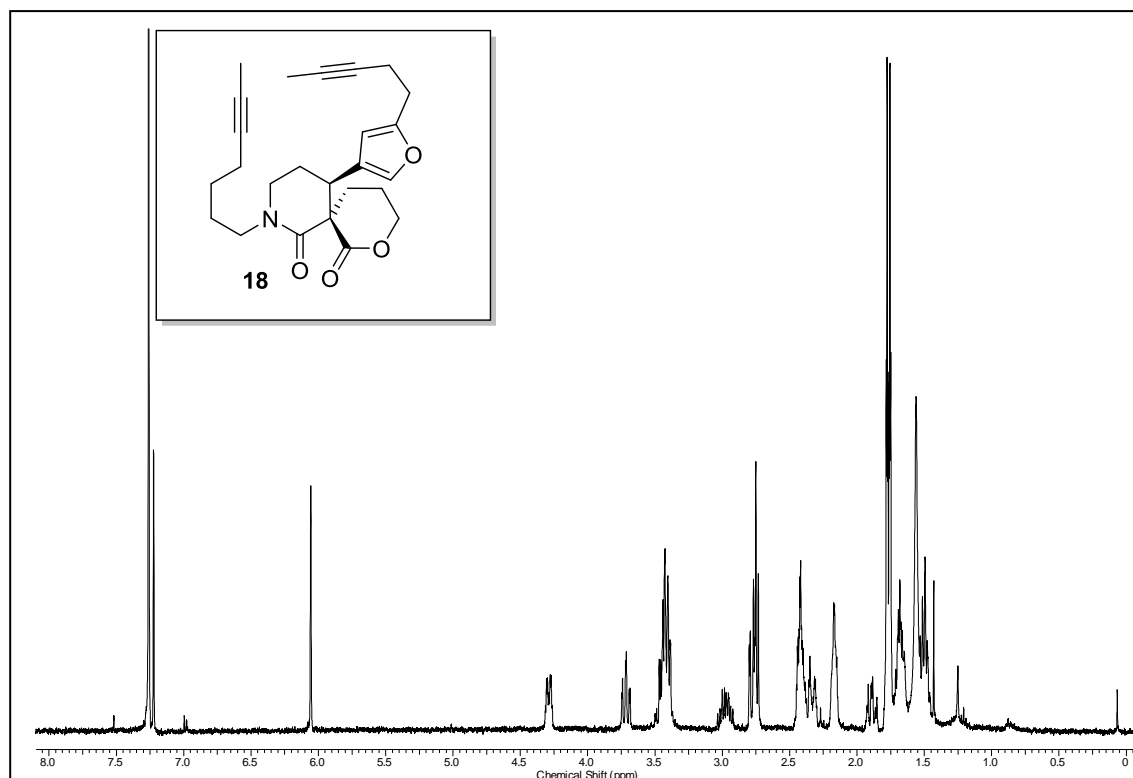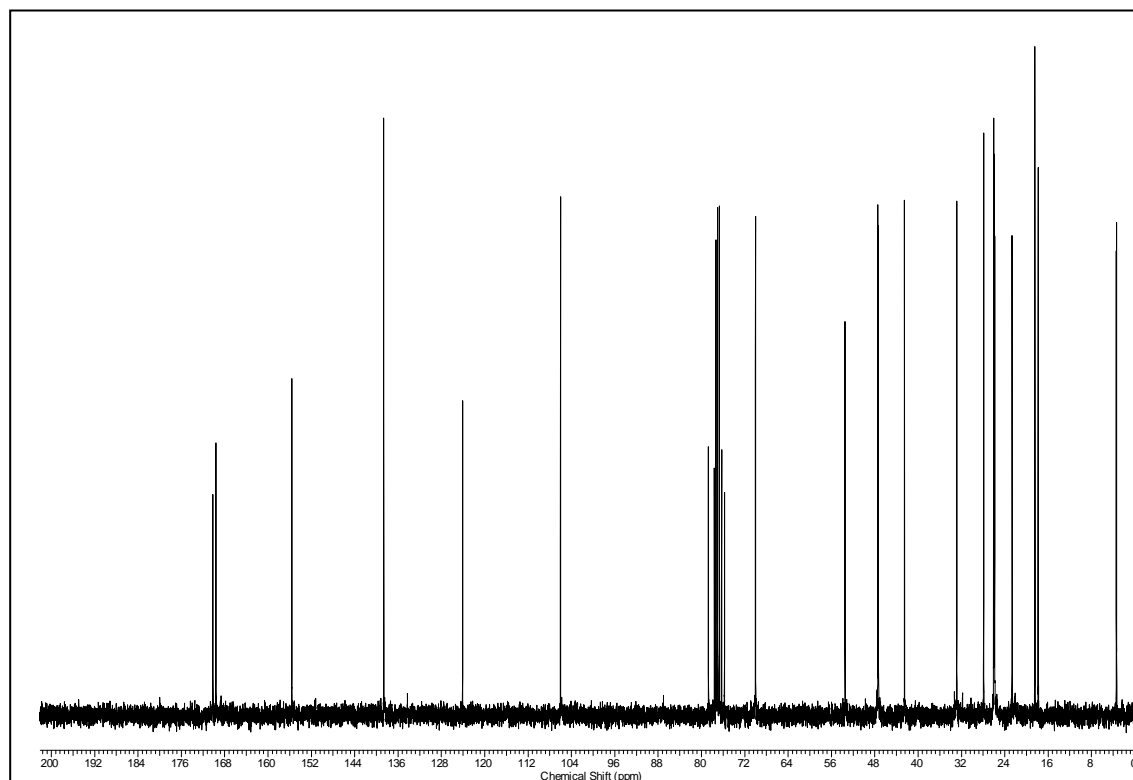

## 5.9 $^1\text{H}$ and $^{13}\text{C}$ NMR spectra of 20

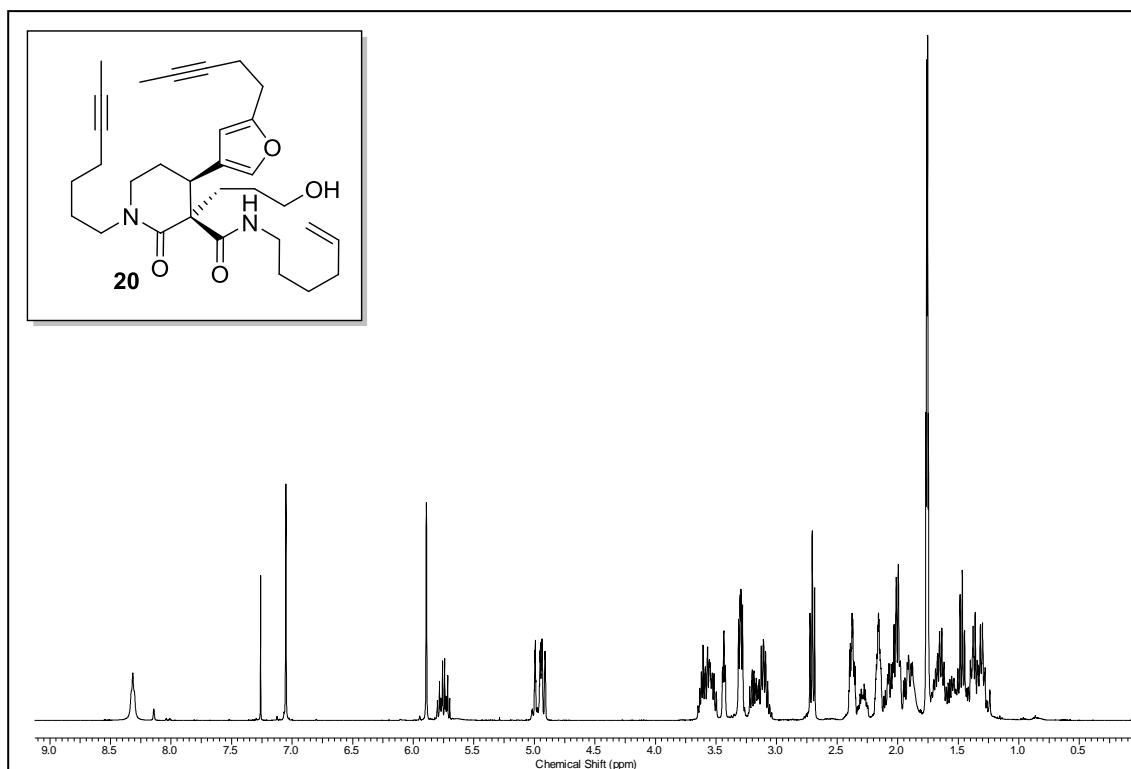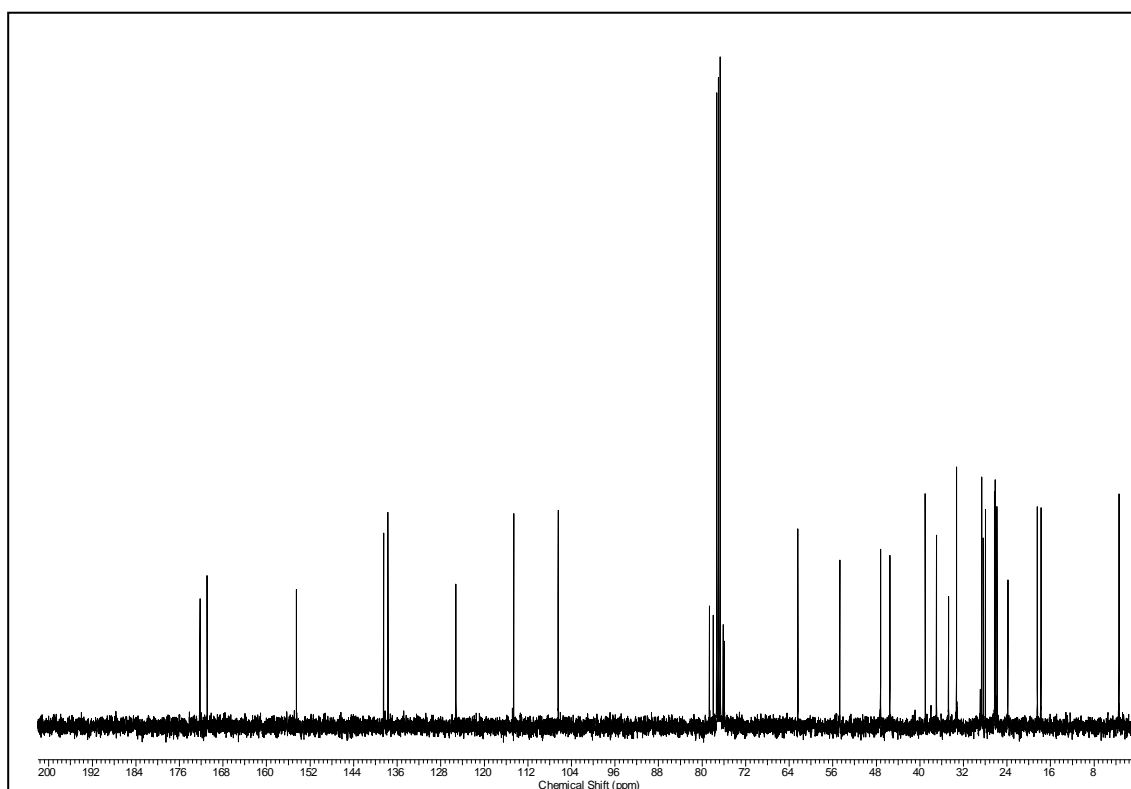

## 5.10 $^1\text{H}$ and $^{13}\text{C}$ NMR spectra of 21

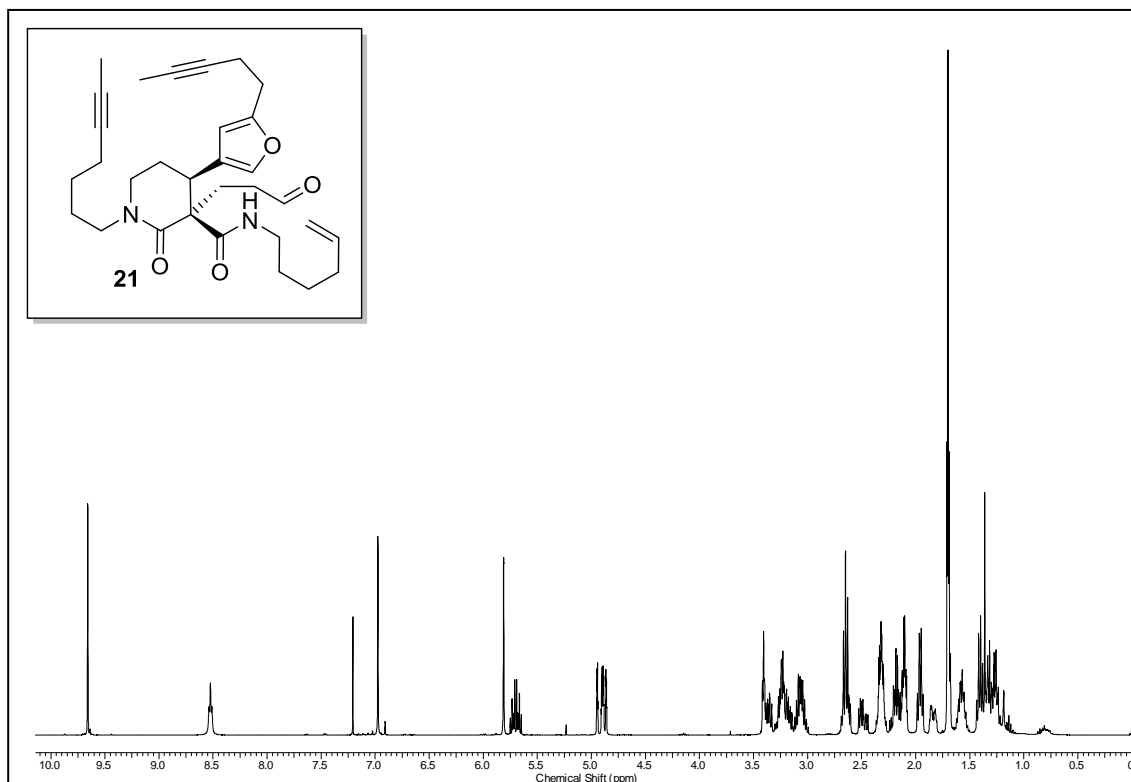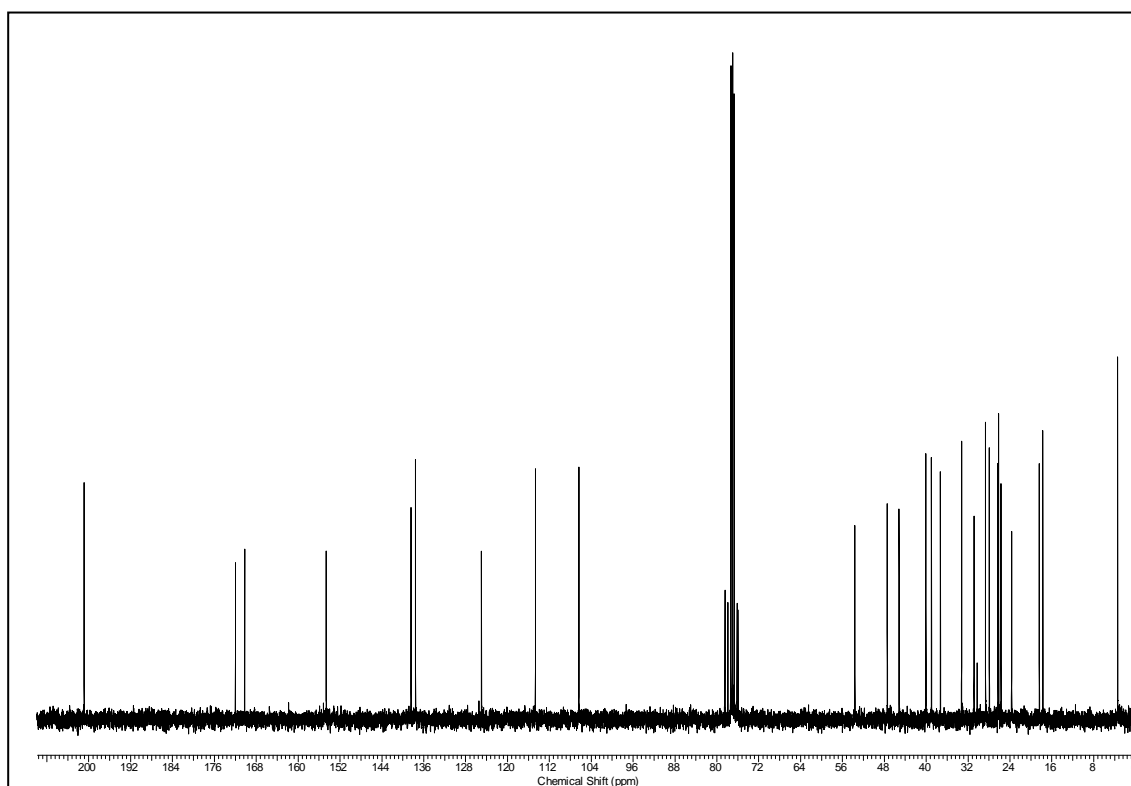



## 5.11 $^1\text{H}$ and $^{13}\text{C}$ NMR spectra of **5**

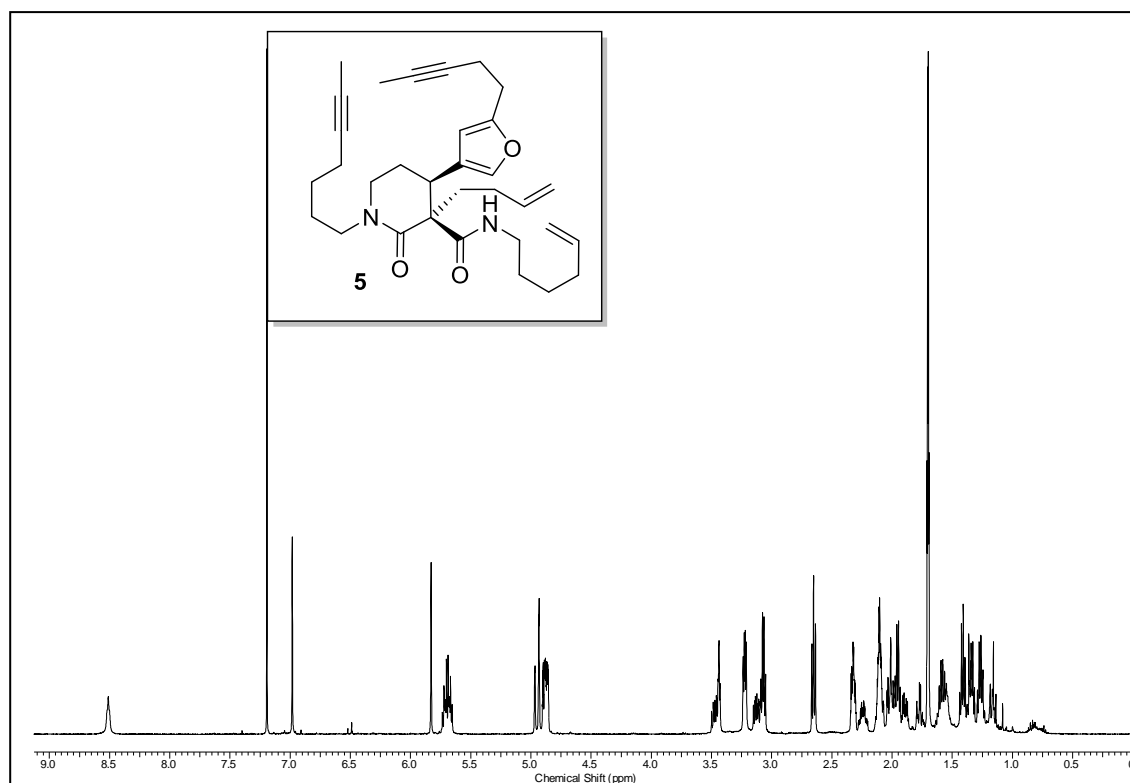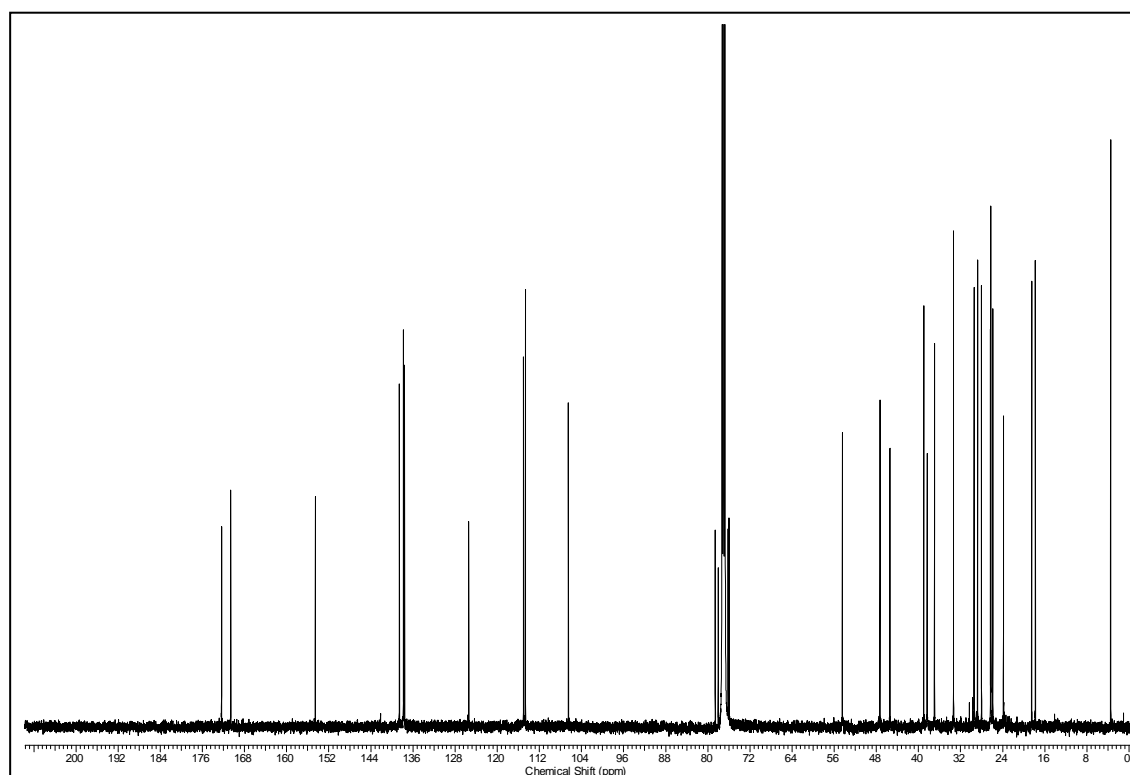

## 5.12 HPLC chromatogram of 13

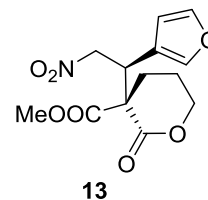

(Chiralpak AS-H, hexane/isopropanol = 80/20, 1 mL/min)

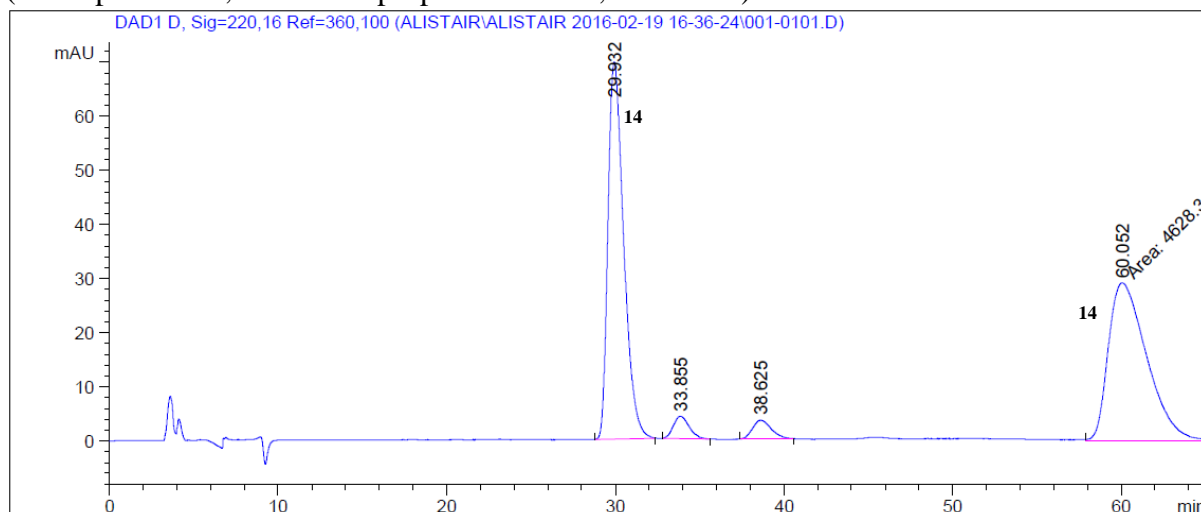

Signal 4: DAD1 D, Sig=220,16 Ref=360,100

| Peak # | RetTime [min] | Type | Width [min] | Area [mAU*s] | Height [mAU] | Area %  |
|--------|---------------|------|-------------|--------------|--------------|---------|
| 1      | 29.932        | BB   | 1.0007      | 4521.55371   | 69.70821     | 46.6530 |
| 2      | 33.855        | BB   | 0.7836      | 269.92154    | 4.14546      | 2.7850  |
| 3      | 38.625        | BB   | 0.9368      | 272.09949    | 3.47006      | 2.8075  |
| 4      | 60.052        | MM   | 2.6360      | 4628.30469   | 29.26389     | 47.7545 |

Totals : 9691.87943 106.58762

Enantiomerically enriched (90:10 er)

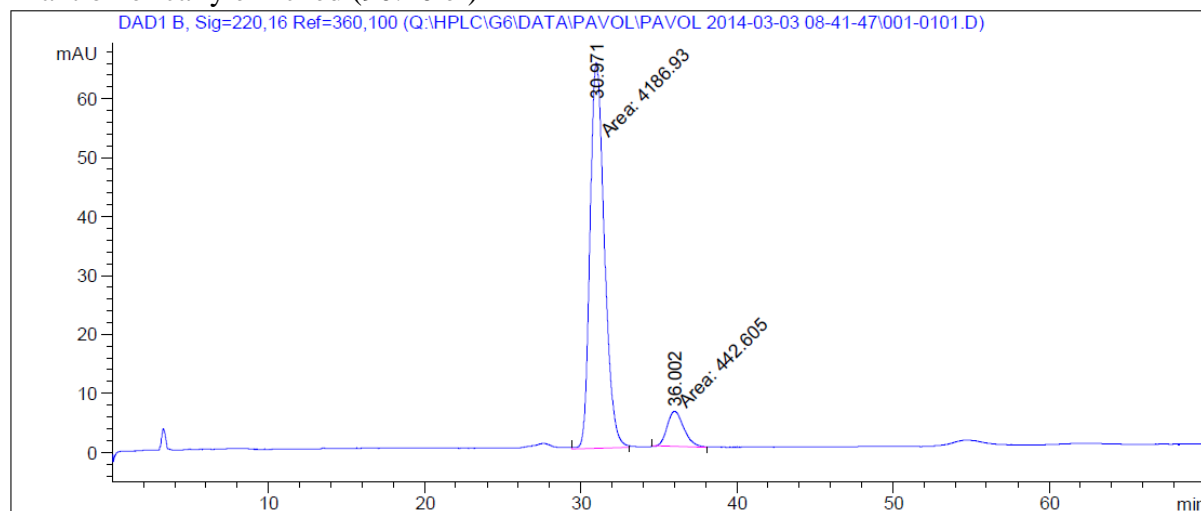

Signal 2: DAD1 B, Sig=220,16 Ref=360,100

| Peak # | RetTime [min] | Type | Width [min] | Area [mAU*s] | Height [mAU] | Area %  |
|--------|---------------|------|-------------|--------------|--------------|---------|
| 1      | 30.971        | MM   | 1.0656      | 4186.92627   | 65.48839     | 90.4395 |
| 2      | 36.002        | MM   | 1.2354      | 442.60526    | 5.97118      | 9.5605  |

Totals : 4629.53152 71.45957

## 5.13 HPLC chromatogram of 6

(Chiralpak OD-H, hexane/isopropanol = 50/50, 0.6 mL/min)

Racemic

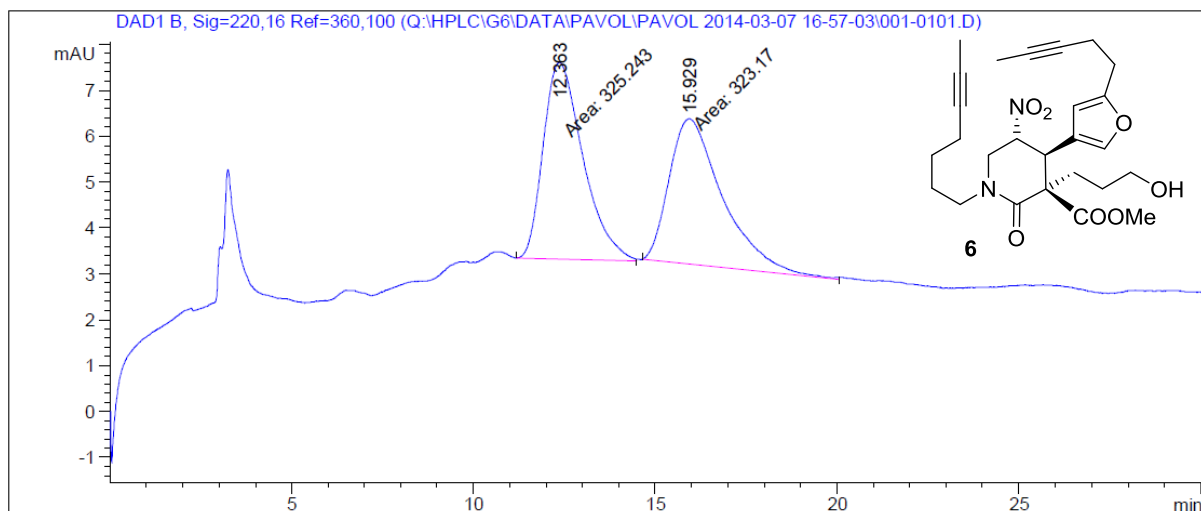

Signal 2: DAD1 B, Sig=220,16 Ref=360,100

| Peak # | RetTime [min] | Type | Width [min] | Area [mAU*s] | Height [mAU] | Area %  |
|--------|---------------|------|-------------|--------------|--------------|---------|
| 1      | 12.363        | MM   | 1.2655      | 325.24335    | 4.28362      | 50.1599 |
| 2      | 15.929        | MM   | 1.7001      | 323.16968    | 3.16806      | 49.8401 |

Totals : 648.41302 7.45168

Enantiomerically enriched (91:9)

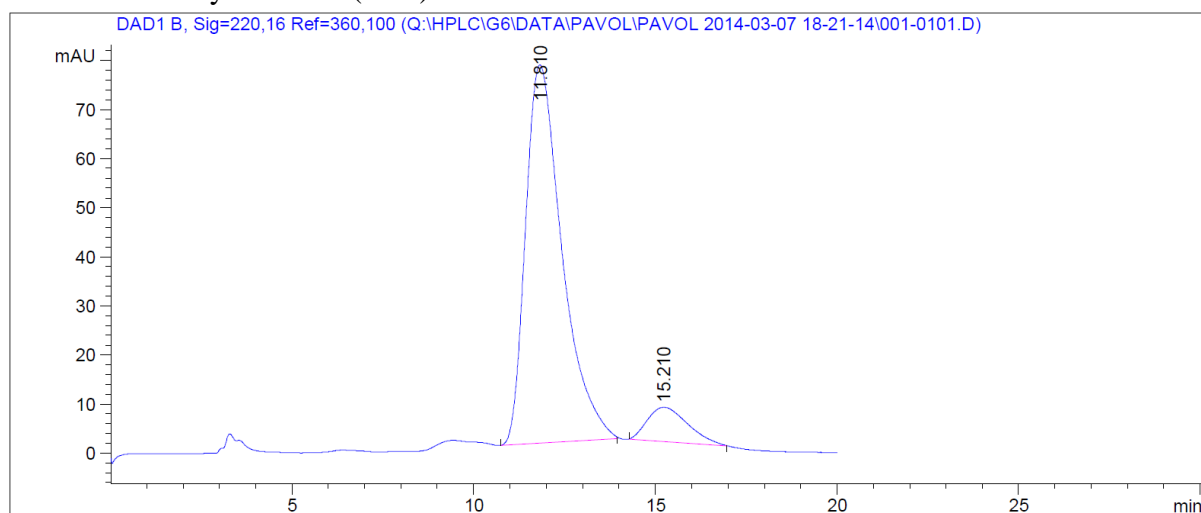

Signal 2: DAD1 B, Sig=220,16 Ref=360,100

| Peak # | RetTime [min] | Type | Width [min] | Area [mAU*s] | Height [mAU] | Area %  |
|--------|---------------|------|-------------|--------------|--------------|---------|
| 1      | 11.810        | BB   | 1.0596      | 5389.31348   | 77.08876     | 90.8487 |
| 2      | 15.210        | BB   | 0.9314      | 542.87494    | 6.96469      | 9.1513  |

Totals : 5932.18842 84.05345
